1 **Improved biodiversity detection using a large-volume environmental DNA sampler with in**  
2 **situ filtration and implications for marine eDNA sampling strategies**

3  
4 Annette F. Govindarajan<sup>a,\*</sup>, Luke McCartin<sup>b</sup>, Allan Adams<sup>c,d,e</sup>, Elizabeth Allan<sup>e,f</sup>, Abhimanyu  
5 Belani<sup>e</sup>, Rene Francolini<sup>a,g,h</sup>, Justin Fujii<sup>e</sup>, Daniel Gomez-Ibanez<sup>e</sup>, Amy Kukulya<sup>e</sup>, Fredrick  
6 Marin<sup>e</sup>, Kaitlyn Tradd<sup>e</sup>, Dana R. Yoerger<sup>e</sup>, Jill M. McDermott<sup>i</sup>, Santiago Herrera<sup>b</sup>

7  
8 <sup>a</sup> Biology Department, Woods Hole Oceanographic Institution, Woods Hole, MA 02543, USA

9 <sup>b</sup> Department of Biological Sciences, Lehigh University, Bethlehem, PA 18015, USA

10 <sup>c</sup> Future Ocean Lab, Massachusetts Institute of Technology, Cambridge, MA 02139, USA

11 <sup>d</sup> Oceanic Labs Research Foundation, Cambridge, MA 02139, USA

12 <sup>e</sup> Department of Applied Ocean Physics and Engineering, Woods Hole Oceanographic  
13 Institution, Woods Hole, MA 02543, USA

14 <sup>f</sup> School of Marine and Environmental Affairs, University of Washington, Seattle, Washington,  
15 USA

16 <sup>g</sup> Bigelow Laboratory for Ocean Sciences, East Boothbay, Maine, 04544, USA

17 <sup>h</sup> School of Marine Sciences, Darling Marine Center, University of Maine, Walpole, Maine,  
18 04573, USA

19 <sup>i</sup> Department of Earth and Environmental Sciences, Lehigh University, Bethlehem, PA 18015,  
20 USA

21

22 \*corresponding author. Email address: [afrese@whoi.edu](mailto:afrese@whoi.edu) (A. F. Govindarajan)

23 **Keywords**

24 Environmental DNA, Metabarcoding, Biodiversity, Autonomous sampling, Mesopelagic, Gulf of

25 Mexico

26

27 **ABSTRACT**

28 Metabarcoding analysis of environmental DNA samples is a promising new tool for marine  
29 biodiversity and conservation. Typically, seawater samples are obtained using Niskin bottles and  
30 filtered to collect eDNA. However, standard sample volumes are small relative to the scale of the  
31 environment, conventional collection strategies are limited, and the filtration process is time  
32 consuming. To overcome these limitations, we developed a new large – volume eDNA sampler  
33 with in situ filtration, capable of taking up to 12 samples per deployment. We conducted three  
34 deployments of our sampler on the robotic vehicle *Mesobot* in the Flower Garden Banks  
35 National Marine Sanctuary in the northwestern Gulf of Mexico and collected samples from 20 to  
36 400 m depth. We compared the large volume (~40 – 60 liters) samples collected by *Mesobot*  
37 with small volume (~2 liters) samples collected using the conventional CTD – mounted Niskin  
38 bottle approach. We sequenced the V9 region of 18S rRNA, which detects a broad range of  
39 invertebrate taxa, and found that while both methods detected biodiversity changes associated  
40 with depth, our large volume samples detected approximately 66% more taxa than the CTD  
41 small volume samples. We found that the fraction of the eDNA signal originating from  
42 metazoans relative to the total eDNA signal decreased with sampling depth, indicating that larger  
43 volume samples may be especially important for detecting metazoans in mesopelagic and deep  
44 ocean environments. We also noted substantial variability in biological replicates from both the  
45 large volume *Mesobot* and small volume CTD sample sets. Both of the sample sets also  
46 identified taxa that the other did not – although the number of unique taxa associated with the  
47 *Mesobot* samples was almost four times larger than those from the CTD samples. Large volume  
48 eDNA sampling with in situ filtration, particularly when coupled with robotic platforms, has

49 great potential for marine biodiversity surveys, and we discuss practical methodological and  
50 sampling considerations for future applications.



## 51 **Introduction**

52

53 Marine ecosystems are facing a host of anthropogenic threats including global warming, ocean  
54 acidification, pollution, overfishing, and invasive species. It is critical to assess the impact of  
55 these threats on biodiversity (Brito-Morales et al., 2020; Sala et al., 2021; St John et al., 2016;  
56 Worm and Lotze, 2021). Metabarcoding analysis of environmental DNA (eDNA) is an important  
57 new tool that can efficiently and effectively help to fill this need (Gallego et al., 2020; Gilbey et  
58 al., 2021). DNA sequencing of the trace genetic remains of animals found in bulk environmental  
59 samples provides detailed information on the taxonomic makeup of marine communities, and  
60 leads to important insights on the diversity, distribution, and ecology of community inhabitants  
61 (e.g., Sawaya et al., 2018; Jeunen et al., 2019; Closek et al., 2019; Djurhuus et al., 2020; West et  
62 al., 2021; Visser et al., 2021). eDNA analyses are being increasingly applied to mid- and deep-  
63 water ocean ecosystems (Canals et al., 2021; Easson et al., 2020; Govindarajan et al., 2021;  
64 Laroche et al., 2020; Merten et al., 2021), and advances in robotics and sampling technology  
65 could improve sampling strategies to these otherwise difficult to reach regions.

66

### 67 *1.1 Conventional eDNA sampling approaches*

68

69 For eDNA analyses in mid and deep-water oceanic environments, seawater is conventionally  
70 collected using Niskin bottles, which are triggered to collect water samples at a particular water  
71 depth and location. Most commonly, the Niskin bottles are mounted on a conductivity  
72 temperature depth (CTD) rosette. A vertical profile of samples can be obtained with the CTD  
73 rosette at each location across a range of depths (Andruszkiewicz et al., 2017; Easson et al.,

74 2020; Laroche et al., 2020; Govindarajan et al., 2021). Niskin bottles can also be mounted on  
75 other platforms, including remotely operated vehicles (ROVs) (Everett and Park, 2018). Upon  
76 recovery, the water samples are immediately filtered, and the filters are preserved for subsequent  
77 processing back in the laboratory. Niskin bottle sampling, however, has many limitations. The  
78 number, size, and deployment mode (e.g., on a CTD rosette) of the bottles is fixed, which  
79 confines experimental design. Sample volumes used for eDNA filtration typically range between  
80 1 to 5 liters and are limited by bottle size, competing scientific needs for sample water, and  
81 filtration capabilities (e.g., how quickly and how many samples can be filtered). Relative to the  
82 vastness of midwater habitats, these eDNA sampling volumes are minute (Govindarajan et al.,  
83 2021; Merten et al., 2021); and may be insufficient for obtaining representative eDNA snapshots,  
84 given that eDNA distributions appear to be patchy (Andruszkiewicz et al., 2017). However, the  
85 issue of optimizing sample volume is relatively poorly understood relative to other eDNA  
86 sampling and processing parameters, such as filter type and DNA extraction protocol (Dickie et  
87 al., 2018). Additional considerations for conventional eDNA sampling are the need to use a clean  
88 work area and sterile procedures during filtration to reduce the possibility of contamination  
89 during processing (Ruppert et al., 2019). Furthermore, the handling time involved for processing  
90 water samples collected with Niskin bottles can potentially take several hours, during which time  
91 the eDNA samples may experience relatively warm temperatures and eDNA in the samples may  
92 potentially decay (Goldberg et al., 2016)

93

94 *1.2 New sampling approaches*

95

96 Integration of water collection with mobile platforms such as autonomous vehicles, combined  
97 with in situ filtration, allows for more efficient water sampling and a greater variety of  
98 experimental design possibilities than is achievable with Niskin bottle sampling. For example,  
99 Yamahara et al. (2019) coupled the Environmental Sample Processor (ESP) with a long-range  
100 autonomous underwater vehicle (LRAUV). Using the LRAUV-ESP, they collected 15 ~ 0.6 – 1  
101 liter water samples for eDNA analysis over the course of two deployments, although their  
102 sampler has the potential to collect up to 60 samples per deployment (Yamahara et al., 2019).  
103 However, the ESP sampler requires approximately one hour to filter one liter of water, and so it  
104 may be best suited for applications that require small sample volumes. Autonomous approaches  
105 with in situ filtration have also been explored for zooplankton sampling (Govindarajan et al.,  
106 2015). In this study, the Suspended Particulate Rosette sampler, originally designed for  
107 biogeochemical sampling, was fitted with mesh appropriate for invertebrate larval collection and  
108 integrated into a REMUS 600 AUV. “SUPR-REMUS” successfully collected barnacle larvae for  
109 DNA barcoding from a coastal embayment with complex bathymetry. For deep-sea  
110 environments where target species are relatively dilute, Billings et al. (2017) developed a very  
111 large volume plankton sampler for the AUV *Sentry*.  
112  
113 For midwater and deep sea eDNA collection, an approach similar to that described above could  
114 be taken, using relevant filter types and seawater sample volumes. Recently, a new autonomous  
115 vehicle, *Mesobot*, was designed for studying the ocean’s midwater environments (Yoerger et al.,  
116 2021). *Mesobot* can operate fully autonomously or with a fiber optic tether and can survey and  
117 unobtrusively track slow-moving midwater animals, as well as collect image and sensor data  
118 such as conductivity, temperature, depth, dissolved oxygen, fluorometry and optical backscatter.

119 *Mesobot* includes a number of features to minimize avoidance and attraction while operating,  
120 including white and red LED lighting and slow-turning, large diameter thrusters that reduce  
121 hydrodynamic disturbances (Yoerger et al., 2021). *Mesobot* also has payload space to  
122 accommodate additional instrumentation, such as an eDNA sampler. The combination of  
123 *Mesobot*'s ability to track animals while obtaining imagery and sensor data make it a promising  
124 and insightful platform for water column eDNA sampling.

125

### 126 *1.3 Goals*

127

128 Our goals were to develop and present a new large-volume autonomous eDNA sampler with in  
129 situ filtration mounted on the midwater robot *Mesobot* and assess its utility for conducting  
130 midwater eDNA surveys relative to conventional CTD-mounted Niskin bottle sampling. Our  
131 study region was the Northwest Gulf of Mexico, and included two sites: Bright Bank in the  
132 Flower Garden Banks National Marine Sanctuary, and a deeper water location on the slope of the  
133 shelf south of Bright Bank. We sampled at depths ranging from 20 m to 400 m with both  
134 methods for their direct comparison. We tested the hypothesis that, because of the larger sample  
135 volumes, our eDNA sampler on *Mesobot* ("*Mesobot*" samples) would capture greater animal  
136 taxonomic diversity than the CTD – mounted Niskin bottle sampling ("CTD" samples) due to the  
137 detection of rare or patchily distributed taxa that were not captured in the small-volume CTD  
138 samples. We predicted that taxa identified from the CTD samples would be a subset of those  
139 detected in the *Mesobot* samples. As we expected that the most abundant taxa would be present  
140 in both sample sets, we also hypothesized that despite the differences in taxon detection, that  
141 overall patterns of community structure identified by the two approaches would be similar. To

142 test these hypotheses, we sequenced the V9 barcode region of 18S rRNA to analyze the  
143 metazoan eDNA community and compared biodiversity metrics from both sample types. We  
144 also described the utility of our eDNA sampler for marine midwater biodiversity surveys,  
145 focusing on the topics of sampling volume and practical methodological issues.

146

## 147 **2 Material and Methods**

### 148 *2.1 Study site*

149 We conducted a cruise on the *R/V Manta* in September of 2019 out of Galveston, Texas, USA.  
150 The CTD samples presented here are a subset of a larger regional survey. Our focal site was  
151 Bright Bank, located in the Northwest Gulf of Mexico off of the coasts of Louisiana and Texas  
152 (Fig. 1). Bright Bank received federal protection in March 2021 as part of the recent expansion  
153 of the Flower Garden Banks National Marine Sanctuary (FGBNMS). Bright Bank is a shelf-edge  
154 carbonate bank that hosts a diverse mesophotic reef ecosystem spanning 117 to 34 m depth  
155 (<https://flowergarden.noaa.gov/>) and is an important habitat for commercially-important and  
156 threatened fish species (Dennis and Bright, 1988; Sammarco et al., 2016). We sampled eDNA  
157 using both the *Mesobot* sampler and CTD casts at two sites: 1) “Bright Bank” site, located within  
158 3 nautical miles of the center of the bank; and 2) “Slope” site located in offshore water at the  
159 slope of the continental shelf, approximately 21 nautical miles south of the bank and with a water  
160 depth of approximately 500 m. No permits were required for our work.

### 161 *2.2 Large-volume eDNA sampler with in situ filtration*

162 We developed an adjustable volume eDNA sampler capable of filtering large seawater volumes  
163 (10s to 100s of liters) that can be mounted on autonomous platforms such as the hybrid robotic

164 vehicle *Mesobot* (Fig. 2; Fig 3; Supplementary Fig. 1). The eDNA sampler consists of 12 pumps  
165 and 12 filters with one pump per filter. The sampler includes two identical pump arrays,  
166 originally designed and built as the core of the Midwater Oil Sampler (MOS), an AUV water  
167 sampler for oil spills. Each MOS pump array contains six submersible pumps (Shenzhen Century  
168 Zhongke Technology model DC40-1250) and a microprocessor that enables an external  
169 computer to command individual pumps and log pump status through an RS232 serial  
170 connection. The MOS pump array is potted in polyurethane and pressure tested to 6000 m depth.  
171 Water enters each filter-pump pair through a unique intake tube. After passing through the pump,  
172 the water exits the assembly through a common discharge tube where a flowmeter  
173 (Omega Engineering FPR-301) measures the flow. Flow measurements are processed and  
174 communicated to *Mesobot* at a frequency of 10 Hz by a secondary microprocessor mounted  
175 inside *Mesobot's* main housing. We built two spare pump arrays, so that upon retrieval  
176 of *Mesobot*, the used sampler can be quickly exchanged with a clean sampler.

177  
178 The pumps are connected by bleach-sterilized plastic tubing to Mini Kleenpak capsule  
179 filters (Pall Corporation, Port Washington, New York, USA; cat. # KA02EAVP8G). Each  
180 filter is individually encapsulated and consists of an inner 0.2  $\mu\text{m}$  Polyethersulfone (PES) filter  
181 and an outer PES pre-filter with a variable pore size, resulting in an effective filtration area of  
182 200  $\text{cm}^2$  for the entire filter capsule. Check valves prevent backflow from reaching any of the  
183 filters. Each pump filters seawater at a rate of approximately 2 L/min. Only one pump per MOS  
184 pump array can be run at a time, but both arrays can be run simultaneously allowing for duplicate  
185 samples to be taken at each of six sampling events.

186

187 The eDNA sampler was mounted on the underside of *Mesobot* (Fig. 2). The timing and duration  
188 of sampling events were controlled by the main control computer inside the main housing of  
189 the *Mesobot* and communicated to the sampler via the secondary microprocessor. To ensure that  
190 samples were taken at the proper time, pump commands were interleaved in the mission control  
191 program sequence which includes motion commands such as depth changes.

192

### 193 *2.3 Sampler deployments on Mesobot*

194

195 Three fully autonomous, untethered *Mesobot* dives were conducted at the Bright Bank (dive  
196 MB009) and the Slope (dives MB011 and MB012) sites (Table 1). Prior to each dive, the  
197 sampler tubing was cleaned with 10% bleach and rinsed multiple times with ultrapure water. The  
198 sampler pumps were then primed by filling the filter capsules with ultrapure water. All filters had  
199 been sterilized by autoclaving before the cruise. An additional sealed filter capsule that was filled  
200 with ultrapure water was attached to *Mesobot*'s base to serve as a field control. It took  
201 approximately an hour and a half of time to complete the pre-dive sampler cleaning and priming  
202 steps by one person. At the start of each dive, *Mesobot* was lowered into the water from the  
203 vessel's A-frame and then released. *Mesobot* then executed the programmed sequence of depth  
204 changes and sampling operations. During these dives, *Mesobot* used its control system and  
205 thrusters to hold depth precisely ( $\pm 1$ cm) while drifting with the ambient currents, much like a  
206 Lagrangian float. During *Mesobot* deployments, an acoustic ultra-short baseline (LinkQuest  
207 TrackLink) tracking system was used to determine the position and depth of the AUV  
208 underwater. During each dive, *Mesobot* could drift several kilometers, accordingly we used the  
209 tracking information to follow the vehicle as it drifted and to ensure that the vessel was

210 positioned appropriately to recover the vehicle when it returned to the surface at the end of the  
211 dive. To help locate the vehicle after it surfaced, the vehicle carried 3 strobe lights, a VHF  
212 beacon, and an Iridium/GPS unit that transmitted the vehicle's surface position through a satellite  
213 link. The additional surface recovery aids were important on the last dive, MB012, when the  
214 USBL tracking system failed and the vehicle surfaced at night time about a kilometer from the  
215 expected position.

216

217 For all deployments, twelve samples (consisting of 6 sets of duplicates, which served as  
218 biological replicates) were collected along vertical transects. At the Bright Bank site, samples  
219 were taken between 120 and 20 m; at the Slope site, samples were taken between 400 and 40 m  
220 over the course of two deployments (Table 1). Once *Mesobot* was recovered after each  
221 deployment, the filter capsules were removed from the sampler and drained, and the ends were  
222 sealed with parafilm. The sealed filter capsules were stored in coolers filled with dry ice within a  
223 few minutes of retrieval.

224

#### 225 *2.4 Conventional CTD – mounted Niskin bottle sampling*

226

227 Seawater samples were collected using a Seabird SBE 19 CTD rosette equipped with twelve 2.5-  
228 liter Niskin bottles. Samples were collected in triplicate (i.e., three biological replicates) at four  
229 depths in each cast, with the target depths selected to complement the *Mesobot* sampling depths  
230 (Table 1). At the Bright Bank site, one CTD cast (“Cast 8”) was conducted and samples were  
231 collected between 40 and 100 m depth. At the slope site, two CTD casts were conducted and



232 samples were collected at depths ranging from 40 to 100 m (“Cast 14”) and from 160 to 400 m  
233 (“Cast 15”) (Table 1).  
234  
235 Once on board the ship, seawater from each Niskin bottle was either transferred to a sterile  
236 Whirl-Pak stand-up sample bag (Nasco Sampling, Madison, WI, USA) and filtered in the wet  
237 lab, or directly filtered from the Niskin bottle on deck. The entire volume of seawater from each  
238 bottle was filtered through a sterile 0.22  $\mu\text{m}$  PES Sterivex filter (MilliporeSigma, Burlington,  
239 MA USA). Sterivex filters have a surface area of 10  $\text{cm}^2$ . Water was filtered using a Masterflex  
240 L/S peristaltic pump (Masterflex, Vernon Hills, IL, USA) set to 60 RPM equipped with four  
241 Masterflex Easy-load II pump heads using Masterflex L/S 15 high-performance precision tubing.  
242 Prior to each cast, the tubing was sterilized by pumping a 10% bleach solution for 5 minutes with  
243 the pump set at 60 RPM. The tubing interior was then rinsed thoroughly by pumping ultrapure  
244 water for 5 minutes at the same flow rate. Following sample filtration, residual water was  
245 pumped out of the Sterivex filters, the filters were placed in sterile Whirl-pak bags, and the bags  
246 were placed on dry ice in a cooler for the remainder of the cruise. The volume of filtered water  
247 was measured with a graduated cylinder and recorded. The average volume of water filtered per  
248 Niskin bottle was  $2.22 \pm 0.25$  SD liters. For each CTD cast, a field control consisting of  
249 approximately 2 liters of ultrapure water was also processed in the same manner and using the  
250 same equipment as the field samples. The total shipboard processing time for the Niskin bottles  
251 was approximately two hours per cast with two people. Upon return to port in Galveston, TX, the  
252 CTD and the *Mesobot* samples were shipped on dry ice to Woods Hole, MA. Upon arrival in  
253 Woods Hole, the filters were stored in a  $-80^\circ\text{C}$  freezer until DNA extraction, which took place  
254 approximately three months later.

255

256 *2.5 eDNA extraction*

257 For the *Mesobot* samples, Mini Kleenpak capsules were opened using a UV-sterilized 3-inch  
258 pipe cutter and the outer and inner PES filters were removed and dissected from the capsules  
259 using a sterile scalpel and forceps. Each inner and outer filter was cut into six pieces, which were  
260 placed into sterile 5 ml centrifuge tubes, and the DNA was extracted from each of the 12  
261 fractions of the filter using DNEasy Blood & Tissue DNA extraction kits (Qiagen, Germantown,  
262 MD, USA), with some modifications to the protocol. 900 ul of Buffer ATL and 100 ul of  
263 proteinase K were added to each 5 ml centrifuge tube. The tubes were incubated at 56° for 3  
264 hours and vortexed periodically during the incubation period. Following the incubation, 1000 µL  
265 of buffer AL and ethanol were added to each centrifuge tube. The entire volume of the lysate was  
266 spun through a single spin column in five steps. Washes were performed according to the  
267 manufacturer's protocol, and DNA extracted from each filter piece was eluted in 80 µL of AE  
268 buffer. The inner and outer filters for each 1/6<sup>th</sup> portion were extracted separately, resulting in a  
269 total of 12 extractions per sample. The DNA concentration of each filter piece extraction was  
270 measured with a Qubit fluorometer (Life Technologies, Carlsbad, CA, USA) using the 1X High-  
271 sensitivity double-stranded DNA assay. Equal volumes of all inner 1/6<sup>th</sup> fractions were pooled  
272 yielding a pooled DNA extract for the inner filter for each sample. Outer 1/6<sup>th</sup> fractions were  
273 pooled in the same manner, resulting in a pooled DNA extract for the outer filter for each  
274 sample. These two pooled DNA extracts were processed separately for subsequent PCR, library  
275 preparation and sequencing.

276

277 For the CTD samples, genomic DNA from the Sterivex filters was extracted using DNEasy  
278 Blood & Tissue extraction kits following the manufacturer's protocol adapted to accommodate  
279 the Sterivex filter capsules (Govindarajan et al., 2021). DNA was eluted in 80  $\mu$ L of molecular-  
280 grade water. The DNA concentration of each Sterivex filter extraction was also measured with  
281 the Qubit 1X High-sensitivity double-stranded DNA assay.

282

### 283 *2.6 Library preparation and sequencing*

284 Library preparation and sequencing followed the approach in Govindarajan et al. (2021) with a  
285 few modifications. All PCR samples were diluted 1:10 in molecular-grade water to prevent  
286 possible inhibition (Andruszkiewicz et al., 2017). Duplicate 2.5  $\mu$ l aliquots from each sample  
287 were amplified in 25  $\mu$ L reactions with 12.5  $\mu$ L of KAPA HiFi HotStart ReadyMix (Kapa  
288 Biosciences, Wilmington, MA, USA), 0.5  $\mu$ L of 10  $\mu$ M forward and reverse primers (final  
289 concentrations of 0.200  $\mu$ M), and 9  $\mu$ L of molecular-grade water. The primers used were 1380F  
290 and 1510R, which amplify the V9 portion of the 18S rRNA gene (Amaral-Zettler et al., 2009)  
291 with CS1 and CS2 linkers for subsequent ligation of Fluidigm adaptors. The primer sequences  
292 with linkers are: ACACTGACGACATGGTTCTACACCCTGCCHTTTGTACACAC (1380F-w-  
293 CS1-F) and TACGGTAGCAGAGACTTGGTCTCCTTCYGCAGGTTACCTAC (1510R-w-  
294 CS2-R). Primers were ordered from Eurofins Genomics (Louisville, KY, USA) at 100  $\mu$ M  
295 concentration in TE buffer and diluted to 10  $\mu$ M to prepare the PCR reactions. Cycling  
296 conditions included an initial denaturation step at 95°C for 3 minutes; 25 cycles of 95°C for 30  
297 seconds, 55°C for 30 seconds, and 72°C for 30 seconds; and a final extension step of 72°C for 5  
298 minutes. PCR products were visualized on a 1% agarose gel in TBE buffer stained with GelRed  
299 (Biotium, Fremont, California, USA) to determine the presence of amplicons of the expected

300 size. The duplicate PCRs were pooled and sent to the Genome Research Core at the University  
301 of Illinois at Chicago (UIC).

302 At the UIC Genome Research Core, a second round of PCR amplification was conducted to  
303 ligate unique 10-base barcodes to each PCR product. The PCR was conducted using MyTaq HS  
304 2X master mix and the Access Array Barcode Library for Illumina (Fluidigm, South San  
305 Francisco, CA, USA). Cycling conditions included an initial denaturation step at 95°C for 5  
306 minutes; 8 cycles of 95°C for 30 seconds, 60°C for 30 seconds, and 72°C for 30 seconds; and a  
307 final 7-minute extension at 72°C. The barcoded PCR products were pooled and purified using  
308 1.0X Ampure beads (Beckman Coulter, Indianapolis, IN, USA). This method retains amplicons  
309 (with primers, linkers, and adapters) longer than 200 bp.

310

311 An initial paired-end, 150-basepair sequencing run on an Illumina MiniSeq platform was  
312 conducted to determine the expected number of reads per sample. Equal volumes of each library  
313 were pooled, and the pooled libraries with a 15% phiX spike-in were sequenced. The volumes of  
314 each sample to be pooled for subsequent sequencing on an Illumina MiSeq were adjusted based  
315 on the relative number of reads produced by the initial MiniSeq run. Our goal was to obtain an  
316 equal sequencing depth among all field samples. Volumes pooled ranged from 1.0 to 30.0  $\mu$ L.  
317 The vast majority of the negative controls (filtration blanks, extraction blanks, and no-template  
318 controls) produced very few reads on the MiniSeq run. One  $\mu$ L of each was pooled to increase  
319 the overall sequencing effort of the field samples; however, for the *Mesobot* filtration blanks, the  
320 volume was adjusted in the same manner as for the field samples. The volume-adjusted libraries  
321 were loaded on to a MiSeq platform and sequenced using v2 chemistry targeting paired-end 250  
322 bp reads. De-multiplexing of reads was performed on the instrument. In addition to our sampler

323 and Niskin bottle samples, additional Niskin bottle samples from the larger Bright Bank survey  
324 and their associated controls were also included on the sequencing runs. As these samples and  
325 controls were processed along with our focal samples, we included these additional controls in  
326 our sequence quality control (described below). In total, three MiSeq runs were conducted with  
327 the intent of obtaining a target depth of approximately 100,000 reads per sample.

328

### 329 *2.7 Contamination controls*

330 Rigorous procedures to prevent and monitor contamination were taken at every step from sample  
331 collection through sequencing. During sampling filtration, all surfaces in the wet lab were  
332 cleaned with 10% bleach and rinsed multiple times with ultrapure water before every use. Nitrile  
333 gloves were worn and changed often. Field controls were taken for every *Mesobot* and CTD  
334 sampling event as described above. Back on shore, DNA extractions were conducted at WHOI in  
335 the Govindarajan lab and PCR reactions were prepared at Lehigh University in the Herrera lab.  
336 Post-PCR products were handled for gel electrophoresis in a separate laboratory space at Lehigh  
337 University. All procedures in the WHOI, Lehigh, and UIC sequencing laboratories included the  
338 following measures to ensure sample integrity: 1) Nitrile lab gloves were always worn and  
339 changed frequently; 2) Pipettes were UV-sterilized before use and sterile filter tips were used; 3)  
340 All lab surfaces were cleaned with 10% bleach and rinsed with Milli Q water before each use; 4)  
341 PCR preparations were conducted in a PCR hood with a HEPA filter with positive airflow, and  
342 the work space was additionally decontaminated with UV light before each use; 5) Field controls  
343 were extracted, amplified and sequenced alongside the field samples; and 6) Six DNA extraction  
344 blanks were amplified and sequenced, and two PCR no-template controls (NTC) were included  
345 in each plate for the first round of PCR, pooled and sequenced.

346

347 None of the negative controls (filtration blanks, extraction blanks and PCR NTCs) produced  
348 visible amplicons after the first PCR, and the vast majority produced far fewer sequencing reads  
349 than the field samples, as expected ( $105 \pm 137$  s.d. vs  $33,902 \pm 25,543$  s.d.). Two of the control  
350 sample libraries, a field negative control from a CTD cast not included in the data analysis and a  
351 PCR no-template control, produced more reads than expected (12,385 and 5,299, respectively).  
352 These and four other samples were re-sequenced to obtain correct data for the misprocessed field  
353 control and to validate our initial sequencing results (Appendix 1).

354

## 355 *2.8 Bioinformatics*

356 Sequencing data was received as demultiplexed fastq.gz files for each sample and was processed  
357 using Quantitative Insights Into Microbial Ecology 2 (QIIME2) version 2020.11 (Bolyen et al.,  
358 2019), following the general approach described in Govindarajan et al. (2021). Raw data was  
359 deposited in Dryad. Sequence quality plots were examined, forward primer sequences at the 5'  
360 end and reverse complements of reverse primers at the 3' end were trimmed using the Cutadapt  
361 QIIME2 plugin (Martin, 2011). Sequences were quality filtered, truncated to 120 base pairs in  
362 length, denoised, and merged using DADA2 (Callahan et al., 2016) within the QIIME2 platform.  
363 Sequences from each run were processed separately and merged after the DADA2 step.  
364 Singleton and doubleton (summed through the dataset) ASVs were removed from further  
365 analysis. These and subsequent merging and filtering steps were accomplished using the QIIME2  
366 feature-table plugin. The resulting amplicon sequence variants (ASVs) were taxonomically  
367 classified using a naïve Bayesian classifier (Bokulich et al., 2018) that was trained on the Silva  
368 v.132 99% small subunit rRNA database (Quast et al., 2013) for the 18S V9 amplicon region.

369 For each ASV in the dataset that was present in both the samples and in any of the controls, the  
370 maximum number of reads found in any control was subtracted from every sample (0.84% of the  
371 sample dataset). An additional 143 reads (0.00086% of the remaining sequences) that were  
372 classified as human and insect were removed. The resulting dataset was then filtered to include  
373 metazoan sequences only. Sampler inner and outer filters were analyzed both separately and  
374 together. Biodiversity was visualized using broad taxonomic categories (Silva levels 6 and 7;  
375 generally corresponding to order or family, respectively). The V9 marker is not used for species  
376 – level identification and species – level identification was outside the scope of this work.  
377 Rarefaction curves were generated in QIIME2 to assess and compare sequencing depths. After  
378 randomly sampling the data from each sample to the lowest sequencing depth of any field  
379 sample, Bray-Curtis dissimilarities were calculated in QIIME2 and were used to generate non-  
380 metric multidimensional scaling (nMDS) plots with sampling depth and sample type (*Mesobot* or  
381 CTD) visualized using the package *vegan* 2.3\_5 (Oksanen et al., 2016) in R Version 4.0.4 (R  
382 Core Team, 2021). For the *Mesobot* filters, nMDS plots were also generated to compare the  
383 diversity collected on inner and outer filters. In this analysis, 4 samples with exceptionally low  
384 read counts on the inner filter were excluded, as described in the results section. Functional  
385 regressions of sampling depth against each nMDS axis were conducted to assess the significance  
386 of observed patterns (Ricker, 1973). Permutational multivariate analysis of variance  
387 (PERMANOVA) tests were conducted using the “adonis” function in *vegan* to assess the effects  
388 of sample type, sampling depth, and for *Mesobot* filters, inner and outer filter type. Taxon  
389 comparisons between sample categories (e.g., filter type, sampling approach, depth) were  
390 performed using an online Venn diagram tool from the University of Ghent  
391 (<http://bioinformatics.psb.ugent.be/webtools/Venn/>).

392

### 393 **3 Results**

#### 394 *3.1 Sampler performance, and sample collection summary*

395

396 The *Mesobot* sampler collected a total of 36 samples on three successful deployments (Table 1;  
397 Supplementary Table 1). Duplicate samples at 6 depths were obtained in each deployment, for a  
398 total of 12 samples per deployment. In the first deployment (MB009), the sampler pumps ran for  
399 20 minutes at 20 m depth intervals between 120 m and 20 m. In the second deployment  
400 (MB011), the sampler took 30-minute samples at 40 m depth intervals between 400 m and 200  
401 m. In the third deployment (MB012), the sampler took one pair of samples filtering for 30  
402 minutes at 320 m, and additional sample pairs filtering for 20 minutes at depths of 160 m, 100 m,  
403 80 m, 60 m, and 40 m. For all deployments, the sampler flow rate was slightly over 2 liters per  
404 minute. The flow rate typically declined gradually over the sampling period, consistent with our  
405 expectation that material was accumulating on the filters (Fig. 4).

406

#### 407 *3.2 CTD data and Niskin bottle sample collection summary*

408 A total of 34 eDNA samples were collected with Niskin bottles over 3 CTD casts (Table 1;  
409 Supplementary Table 2). Twelve Niskin bottles were deployed on each CTD cast, but one  
410 sample was lost from Cast 8 (100 m) and another from Cast 15 (400 m) due to bottle  
411 malfunctions. The CTD profiles from these casts indicated a stratified water column with a  
412 thermocline beginning around 40 m at the Bright Bank site and 50 m at the Slope site, with the  
413 deep chlorophyll maximum (DCM, corresponding to peak fluorescence) slightly deeper than the  
414 thermocline (Supplementary Fig. 2).



415

### 416 *3.3 Total eDNA yield*

417 As expected given the larger sample volumes, the sampler collected more eDNA than the Niskin  
418 bottle sampling. However, the eDNA yield per liter of water filtered was comparable between  
419 methods for samples collected at the same depth (Fig. 5). eDNA concentration yields were  
420 higher in shallower water (i.e., less than 100 m), with the highest yields (up to ~8 ng/μl) roughly  
421 coinciding with the approximate depth of the DCM (60 m) (Supplementary Fig. 2). eDNA yields  
422 were much lower (<1.5 ng/μl) at sampling depths greater than 100 m. For the *Mesobot* samples,  
423 the inner filters generally yielded slightly higher (i.e., within a couple ng/μl) DNA  
424 concentrations than the outer filters, with greater variation at the Bright Bank site, where one  
425 inner filter yielded ~30 ng/ul more DNA than its corresponding outer filter (Fig. 6). For any  
426 given inner or outer filter from a *Mesobot* sample, the DNA concentrations of the extractions  
427 stemming from individual filter pieces were relatively similar in most cases, but a few samples  
428 (particularly those with the higher overall DNA yields) showed substantial variation (Fig. 6).

429

### 430 *3.3 Metazoan sequence diversity*

431 The number of metazoan reads varied greatly within and between *Mesobot* sampler and CTD  
432 datasets, and also between the Mini Kleenpak inner (*Mesobot*-inner, “MBI”) and outer (*Mesobot*-  
433 outer; “MBO”) filter dataset (Table 2; Supplementary Table 3). The MBO dataset consisted of 36  
434 samples with 1,096 metazoan ASVs and 2,700,417 metazoan sequences. The mean number of  
435 reads per sample ranged from 23,530 to 207,391 with a mean of 75,012. The MBI dataset, with  
436 36 samples, in general had fewer metazoan ASVs (703), total sequences (582,246) and reads per  
437 sample (mean = 16,173.5 reads, min = 3 reads; max = 68,149 reads). For a given *Mesobot*

438 sample, the majority of metazoan reads originated from the outer filter, both in terms of the  
439 percent of metazoan reads in the dataset (Fig. 7) and in the absolute number of metazoan  
440 sequences (Supplementary Table 3). *Mesobot* samples from Bright Bank (MB009) in general had  
441 proportionately more metazoan sequences on the outer filter than those from the Slope site  
442 (MB011 and MB012) (Fig. 7).

443

444 The CTD dataset included 34 samples with 517 metazoan ASVs and 1,477,377 metazoan  
445 sequences. The number of metazoan reads per sample ranged from 3,354 to 99,996, with a mean  
446 of 43,453, and in most samples, represented less than half of the total number of reads (Fig. 7).  
447 Metazoan reads were proportionately more abundant in Bright Bank CTD samples (Cast 8) than  
448 in the Slope CTD samples (Casts 14 and 15) (Fig. 7).

449

450 Asymptotic rarefaction curves indicated that the sequencing depth was sufficient to capture the  
451 diversity in most of the CTD and *Mesobot* samples, and that *Mesobot* samples generally  
452 recovered more ASVs than the CTD samples (Fig. 8). The only exception to this pattern was one  
453 CTD sample from Cast 15, sampling at 240 m, which detected an unusually high number of  
454 ASVs (Fig. 8) although it had slightly less than the average number of sequence reads (40,691  
455 reads) (Supplementary Table 3).

456

### 457 *3.5 Taxonomic composition of the inner and outer sampler filters*

458

459 The *Mesobot* and CTD samples from both the Bright Bank and Slope sites were comprised of  
460 ASVs originating from a wide variety of animal groups (Fig. 9; Fig. 10). Samples were generally

461 dominated by copepod reads (calanoid and cyclopid) which often comprised the majority of  
462 metazoan reads, but ostracods (Halocyprida) and siphonophores were also notably common.  
463 Siphonophores occasionally comprised the majority of metazoan reads in some samples,  
464 especially in CTD Cast 15 (e.g., at depths 160 m, 320 m, and 400 m at the Slope site). Ostracods  
465 were relatively abundant from some samples especially in *Mesobot* deployment MB009 (at the  
466 Bright Bank site) at sampling depths 80 m and greater, and in *Mesobot* deployment MB011 (the  
467 deep deployment at the Slope site). Very few reads were classified as fish. While the same broad  
468 taxonomic groups were generally present among samples, sample biological replicates varied  
469 substantially in the relative abundances of taxa (Fig. 9; Fig. 10). Occasionally, it appeared that  
470 one taxon would overwhelmingly dominate a particular sample but would be much less common  
471 in the corresponding duplicate sample (e.g., siphonophores in samples 320-1 and 400-1 in Cast  
472 15, and in sample 160-1 in MB011; Fig. 9).

473  
474 We compared the Silva level-7 taxa found in samples taken by both methods at a given site and  
475 depth. In all but one case, the *Mesobot* samples (duplicates for the site/depth pooled; representing  
476 ~80 – 120 liters of water sampled) detected, on average, 1.66 times more taxa than  
477 corresponding CTD samples (triplicates for the site/depth pooled, representing ~6 liters of water  
478 sampled) (Table 3; Appendix 2). There were between 22 – 33 shared taxa (detected in both  
479 sampling approaches) depending on the depth, representing on average 36% of all taxa detected  
480 at a given depth. There were typically more taxa unique to the *Mesobot* samples (25 – 40) than  
481 were unique to the CTD samples (2 – 12; Table 3), representing, on average, 43% (*Mesobot*) and  
482 11% (CTD) of all taxa at a given depth. The one exception was at the Slope site at 240 m depth,  
483 where there were 33 taxa detected by both sample types but the CTD samples detected 23 unique

484 taxa and the *Mesobot* detected only 9 unique taxa. One of the CTD replicates from this depth was  
485 the same sample noted to have an unusually high number of ASVs (Fig. 8). Also at the Slope  
486 site, one depth (320 m) was sampled during two Mesobot deployments (MB011 and MB012) as  
487 well as with the CTD. In this case, both *Mesobot* samplings detected more unique taxa than the  
488 CTD sampling, and also each *Mesobot* deployment detected several taxa that the other didn't.

489  
490 The Bright Bank and Slope datasets were rarefied to their lowest sequencing depths (17,793 and  
491 3,354, respectively) before calculating Bray-Curtis dissimilarities. The nMDS and  
492 PERMANOVA analyses indicated structuring relative to sampling depth at the Bright Bank (Fig.  
493 11; sample type:  $R^2 = 0.06688$ ,  $p = 0.013$ ; depth:  $R^2 = 0.51695$ ,  $p = 0.001$ ) and Slope (Fig. 11;  
494 sample type:  $R^2 = 0.06181$ ,  $p = 0.001$ ; depth:  $R^2 = 0.41870$ ,  $p = 0.001$ ) sites. Sampling depth had  
495 a greater impact than sampling type at the Bright Bank site. These results were supported by  
496 functional regressions showed that sampling depth was strongly correlated with the first  
497 dimension (MDS1) (Bright Bank:  $R^2 = 0.7551$ ,  $p = 0$ ; Slope:  $R^2 = 0.6218$ ,  $p = 0$ ) but not the  
498 second (Bright Bank:  $R^2 = 0.005519$ ,  $p = 0.7439$ ; Slope  $R^2 = 0$ ,  $p = 0.9905$ ), and no obvious  
499 trend with sampling type (Supplementary Fig. 3).

500  
501 When the inner and outer filters for each *Mesobot* sampler sample were analyzed separately, the  
502 relative proportions of the most abundant taxa differed (Fig. 12; Fig. 13). When calculating  
503 Bray-Curtis dissimilarities, the dataset was rarefied to 3,438 reads. Four samples from  
504 deployment MB009 (1 sample from 20 m, 2 samples from 40 m, and one sample from 100 m)  
505 where the inner filters had read counts below this threshold were excluded. The PERMANOVA  
506 results indicated that sampling depth (Bright Bank:  $R^2 = 0.29513$ ,  $p = 0.001$ ; Slope:  $R^2 =$

507 0.15503,  $p = 0.01$ ) had a greater impact than filter type (Bright Bank:  $R^2 = 0.05691$ ,  $p = 0.123$ ;  
508 Slope:  $R^2 = 0.04972$ ,  $p = 0.02$ ). This was visualized in the nMDS plot (Fig. 13). Regressions  
509 showed that depth was correlated with the first dimension ( $R^2 = 0.8614$ ,  $p = 0$ ) but not the second  
510 ( $R^2 = 0.003707$ ,  $p = 0.7932$ ) (Supplementary Fig. 4). In general, gelatinous taxa including  
511 siphonophores, trachymedusae, and larvaceans (Oikopleuridae) were more abundant on the inner  
512 filters than the outer filters. Out of a total of 181 Silva level-7 (the most highly-resolved level in  
513 the Silva classification) taxa, 118 were found on both filter types, 18 on the inner filters only, and  
514 45 on the outer filters only. Notably, there were no crustaceans or fish unique to the inner filters;  
515 while there were 7 crustaceans (5 copepods and two eumalacostracans) and two fish unique to  
516 the outer filters (Appendix 2). The taxa that were unique to the inner filters were primarily  
517 medusozoans, ctenophores, sponges, and polychaetes and other worm-like groups.

518

#### 519 **4 Discussion**

520

521 We built a large – volume eDNA sampler and successfully deployed it during three dives using  
522 *Mesobot* as our sampling platform. Our sampler filtered approximately 20 – 30 times more  
523 volume per sample (~40-60 liters) than our conventionally – obtained CTD samples (~2 liters).  
524 Our hypothesis, that there would be more taxa identified from the large – volume *Mesobot*  
525 samples, was supported. We found 66% more taxa in *Mesobot* samples than CTD samples. We  
526 also found that the majority of taxa found in the CTD samples were also found in corresponding  
527 *Mesobot* samples (78% on average). However, we found that there was also substantial variation  
528 between replicates in both the *Mesobot* and CTD sample sets, and despite recovering fewer  
529 overall taxa, that the CTD samples did collect unique taxa corresponding to 11% of all taxa

530 sampled at a given depth (compared to 43% taxa sampled only by *Mesobot*). *Mesobot* and CTD  
531 sample sets both showed that community composition patterns are strongly associated with  
532 depth, thus supporting our hypothesis that despite the differences in taxon detection, the overall  
533 community patterns revealed by both methods would be similar.

534

#### 535 *4.1 Sampling volume*

536 While highly variable in both sampling types, our *Mesobot* eDNA capture rate (in terms of the  
537 concentration of our extractions as measured by the Qubit fluorometer) was in the same range as  
538 for the CTD sampling, after accounting for sample volume and depth. Our study shows a  
539 decrease in eDNA with depth that is consistent with previous studies (Govindarajan et al., 2021;  
540 McClenaghan et al., 2020). This finding indicates that greater sample volumes are needed for  
541 mid and deep water eDNA biodiversity analyses. This is especially true when the focal  
542 organisms are animals (as opposed to microbes) – given the small fraction (of metazoan sequence  
543 reads we observed in our samples (e.g., <50% in most and <10 % in some) and when the eDNA  
544 signal is inhomogeneous.

545

546 Sampling approaches and theory are understudied aspects of eDNA protocols (Dickie et al.,  
547 2018), and future work should evaluate the optimal sampling volume and strategy as a function  
548 of the environment and the biology of target taxa (Mächler et al., 2016). Studies in other  
549 environments have similarly demonstrated that increasing sample volumes can improve  
550 biodiversity detection (Bessey et al., 2020; Hestetun et al., 2021; Schabacker et al., 2020;  
551 Sepulveda et al., 2019). Because our eDNA sampler can efficiently pump a much larger volume  
552 than that which can be captured by a single Niskin bottle, it represents a better tool for collecting

553 eDNA at deeper ocean depths (i.e., below ~100 m). Increasing the sample volume may be  
554 especially important for studies in mesopelagic and deeper waters where animal eDNA may be  
555 more dilute and when detection of rare taxa is an objective of the study. It is often of interest to  
556 obtain vertical profiles in mesopelagic studies, as the vertical dimension is a key axis for  
557 environmental variables such as light availability, and for ecological processes such as diel  
558 vertical migration. For vertical sampling transects that run from shallow water (e.g., < 100 m, or  
559 above the thermocline or DCM) to deep water (e.g., > 100, or below the thermocline or DCM),  
560 it may be advantageous to adjust sampling volume with depth (e.g., Laroche et al., 2020).

561

#### 562 *4.2 Filters for large – volume sampling*

563 Filter selection requires special consideration in large-volume eDNA filtering. Previous studies  
564 that used larger sample volumes have taken different approaches. Small (submicron) pore size  
565 filters which are typically used in eDNA sampling may have slow filtration rates and the filters  
566 could become easily clogged (Turner et al., 2014). Some researchers obtain higher sample  
567 volumes by utilizing multiple submicron-opening filters (Goldberg et al., 2016; Mächler et al.,  
568 2016); but the disadvantages to this approach are the length of time needed to do the filtering and  
569 the cost and processing time for multiple filters and their subsequent analyses including  
570 additional DNA extractions, PCR, and sequencing. Other studies have utilized larger-pore size  
571 filters (Schabacker et al., 2020), but the disadvantage is that taxa that have eDNA predominantly  
572 associated with smaller particles could be missed (Sepulveda et al., 2019). Additionally, when  
573 large volumes are filtered, it is likely that some intact animals are collected in addition to eDNA.  
574 The ideal filter pore size depends on the form of the eDNA of the target taxa; however, eDNA  
575 particle sizes are known for only very few taxa (Jo et al., 2019; Moushomi et al., 2019; Turner et

576 al., 2014) Sometimes, a pre-filter to screen out large particles and even whole organisms is used,  
577 but using pre-filters may result in the detection of fewer taxa (Djurhuus et al., 2018), unless the  
578 pre-filter is also processed.

579

580 Our Mini Kleenpak sampler filters had an outer filter with variable-sized pores and an inner filter  
581 with 0.2  $\mu\text{m}$  pores and an effective filtration area of 200  $\text{cm}^2$ . For comparison, the Sterivex filters  
582 were made of the same material (PES) and the same pore size, but had an order of magnitude  
583 smaller filtration area (10  $\text{cm}^2$ ). Our sampler outer filters essentially served as a prefilter to the  
584 inner filters, and we processed and analyzed both, which added to the effort and cost involved.  
585 The processing included dividing each inner and outer filter into 6 pieces and extracting each,  
586 and then pooling and sequencing the inner and outer pieces separately. Thus, each *Mesobot*  
587 sample required 12 extractions and 2 pooled PCR reactions per sample for sequencing (versus 1  
588 extraction and 1 pooled PCR reaction for each CTD sample). There is clearly a tradeoff between  
589 sample volumes and project cost and effort. As this was the first time that we were aware of that  
590 Mini Kleenpak filters were used for eDNA sampling, and the first time that they were used in an  
591 offshore marine environment, we elected to process the entirety of the filter area; however, some  
592 aspects of our protocols could be refined in the future, as we discuss in section 4.3.

593

594 The outer Mini Kleenpak filters contained a much larger proportion of metazoan sequence reads  
595 than the inner filters, indicating a greater retention of animal eDNA on those filters. We observed  
596 a reduction in flow rate through all of our Mini Kleenpak filters over time. As the filter pore  
597 spaces became reduced or blocked, smaller particles that might have initially passed through the  
598 outer filter probably became trapped on the material on the outer filter. Thus, we might expect



599 that eDNA in the form of very small particulates or extracellular DNA could be found on both  
600 filters, and that eDNA in the form of larger particulates or even whole animals would be found  
601 primarily on the outer filters. We found that most metazoan taxa could be detected from both  
602 filter types, but each filter type recovered taxa that the other missed. The taxa found on both  
603 filter types included a broad range of animal groups (e.g., medusozoans, polychaete worms and  
604 other worm-like animals, crustaceans, and fish). However, there were many more taxa,  
605 originating from a broad range of animal groups, that were unique to the outer filters than to the  
606 inner filters. Notably, several crustacean taxa found on the outer filters only but there were no  
607 crustaceans unique to the inner filters. The disproportional presence of crustaceans on the outer  
608 filters only may suggest their eDNA signal is associated with larger particles, and/or that the  
609 outer filters retained zooplankton as well as eDNA.

610

#### 611 *4.3 Logistical considerations*

612 The cost and labor of conducting large volume eDNA sampling and analyses may be higher than  
613 for smaller-volume samples as we have noted here and observed elsewhere (Wittwer et al.,  
614 2018). From the field perspective, our sampler required about an hour and a half of effort per  
615 deployment to prime the pumps, and upon retrieval, the sampler samples could be immediately  
616 stored. In contrast, the CTD sampling and processing required more time after retrieval (about  
617 four hours of effort per deployment) to filter the same number of samples (12) with around 20 –  
618 30 times less volume per sample. In situations where the number of samples is greater or the  
619 sample volumes are larger, the post-retrieval processing time would be even longer, potentially  
620 allowing the eDNA signal to decay. Thus, reduction of post-retrieval shipboard processing time  
621 is an important advantage of using a sampler with in situ filtration.

622

623 Laboratory time and costs are also important to consider. If multiple filters are used to obtain the  
624 large volume, the cost of DNA extraction is multiplied. Here, we utilized a single large-area  
625 filter, and our DNA extraction protocol necessitated dividing up the filter into pieces for  
626 individual extractions. Ideally, only a portion of the filter could be processed and the remainder  
627 could be archived (Sepulveda et al., 2019). However, it would need to be shown first that the  
628 DNA is distributed evenly throughout the filter, and our data suggest that this is not necessarily  
629 the case. If the DNA is not evenly distributed, then by processing only a portion of the filter, the  
630 advantages of large volume filtering will be lost. An alternative to this issue would be to develop  
631 a DNA extraction protocol that processes the whole filter without having to partition it. For Mini  
632 Kleenpak filters, depending on the goal of the study, it might be acceptable to extract only the  
633 outer filters which capture the majority of metazoan diversity, although it should be  
634 acknowledged that taxa with smaller eDNA particle size distributions could be missed.  
635 Alternatively, the sampler design could be adapted to accommodate other filter types that have  
636 only larger openings. Future research with the Mini Kleenpak and other large surface area filters  
637 should also explore refinements to the DNA extraction protocol to reduce the cost and labor  
638 involved, while preserving the ability to detect a wide range of taxa.

639

640 Another relevant sample processing feature that impacts the quantity of taxa detected and should  
641 be further explored is the number of PCR replicates in the library preparation step (Ruppert et al.,  
642 2019). Increasing the number of PCR replicates increases the number of taxa identified (Ficetola  
643 et al., 2015), but also adds to the time and cost of the project. Here, we used duplicate PCRs, but

644 future work should evaluate the benefits of increased replication as this is likely especially  
645 important for large volume samples.

646

#### 647 *4.4 General biodiversity observations*

648 Our eDNA analyses from both the *Mesobot* sampler and the CTD sampling revealed a broad  
649 range of invertebrate taxa, consistent with what other studies have found with the 18S V9 marker  
650 (Blanco-Bercial, 2020; Bucklin et al., 2019; Govindarajan et al., 2021). The paucity of fish reads  
651 is also consistent with these other studies, and prior observations that the V9 marker  
652 preferentially amplifies taxa other than fish (Sawaya et al., 2019). Sequence reads from  
653 crustacean taxa including calanoid and cyclopoid copepods and ostracods were especially  
654 abundant in most samples. Siphonophore reads were also common in samples collected at 80  
655 meters and deeper. While the 18S V9 marker detects a wide variety of taxa, it lacks the  
656 resolution to identify most taxa to species (Blanco-Bercial, 2020; Bucklin et al., 2016; Wu et al.,  
657 2015) and we did not attempt species-level identification in this study. However, future analyses  
658 of these samples with other markers could reveal valuable ecological insights on target species.  
659 In particular, markers targeting fish such as 12S (e.g., Miya et al., 2015) and anthozoans will be  
660 especially relevant for our study site. Additionally, independent methods of characterizing  
661 biodiversity such as analyses of net tows and video are important to relate eDNA signatures to  
662 community composition (Closek et al., 2019; Govindarajan et al., 2021; Stoeckle et al., 2021).  
663 *Mesobot* also has imaging capability (Yoerger et al., 2021) and future studies combining  
664 *Mesobot* imaging with our eDNA sampler will reveal further insights into mesophotic and deep  
665 water biodiversity.

666

667 *4.5 Biodiversity changes with depth*

668 Despite differences in taxon detection, both of our sampling approaches revealed significant  
669 changes in community structure with depth. This is an important finding as it shows that despite  
670 the small volumes of water that are sampled, community biodiversity trends can still be detected  
671 using conventional CTD/Niskin bottle sampling – which is the most common approach to marine  
672 eDNA sampling. Furthermore, despite a myriad of processes that could potentially blur eDNA  
673 signatures in oceanic environments – such as particle sinking, ocean currents, vertical mixing,  
674 and biologically-mediated transport such as diel vertical migration, our results and other recent  
675 studies indicate that eDNA signatures may remain localized. Our finding that eDNA detected  
676 diversity changes on the order of 10s of meters in depth are consistent with modeling results that  
677 show midwater eDNA signatures remain within 20 meters of their origin in the vertical direction  
678 (Allan et al., 2021), and add to a growing body of field evidence from pelagic systems  
679 demonstrating that eDNA can detect biodiversity changes with depth (Canals et al., 2021; Easson  
680 et al., 2020; Govindarajan et al., 2021).

681

682 *4.6 Variation between replicates*

683 Environmental DNA analyses often show substantial variability between replicates (Beentjes et  
684 al., 2019) as we observed here. The optimal number of replicates to include in any eDNA study  
685 depends on the study system and goals; however, replication strategies in eDNA studies are  
686 inconsistent, and generally not optimized (Dickie et al., 2018). The variation observed here and  
687 elsewhere (e.g., Andruszkiewicz et al., 2017; Govindarajan et al., 2021) with CTD sampling  
688 suggests that read abundances in individual samples may not be representative of community  
689 proportions and that absences of taxa may be false negatives. This variation indicates that eDNA

690 distributions are patchy within a given location or depth, even if eDNA communities are  
691 distinguishable between depths.

692

693 At our Slope site, the eDNA community at 320 m depth was sampled during both the MB011  
694 and MB012 deployments, as well as with one CTD cast. We found that despite the more  
695 intensive sampling effort, each sampling event still recovered unique taxa, and in particular the  
696 MB012 sampling event recovered several more taxa (63) than the MB011 sampling event (39)  
697 despite similar sample volumes. These differences may be related to eDNA patchiness in the  
698 horizontal direction. In mesopelagic depths such as this sampling location, diel vertical migration  
699 can create variation in horizontal zooplankton distributions (Chen et al., 2021), which could  
700 result in patchy eDNA distributions. More research on the spatial distribution of eDNA in the  
701 horizontal dimension of midwater environments would be insightful for optimizing eDNA  
702 sampling strategies.

703

704 Larger-volume sampling might be expected to lead to more consistent results in biological  
705 replicates (which are sampled at the same and location). However, we found that the relative  
706 proportions of taxa differed substantially between replicates even in our large-volume *Mesobot*  
707 samples. Given the volume of water that we sampled (~40 - 60 of liters), it is highly likely that  
708 small zooplankton were collected along with the eDNA. This possibility is also consistent with  
709 our observation of several crustacean taxa unique to the outer filters. If zooplankton are retained  
710 on the filters, they would likely be contributing disproportionately to the eDNA reads in that  
711 particular sample. Thus, paradoxically, while larger volumes may smooth out variation in eDNA  
712 particle distributions, the collection of small zooplankton in addition to particles may introduce a

713 new source of variation. The introduction of a pre-filter to screen out the zooplankton, is not a  
714 straightforward solution, as discussed in sections 4.2 and 4.3.

715

#### 716 *4.7 Autonomous sampling with a robotic platform*

717 The combination of autonomous sampling with robotic platforms and molecular sensing is  
718 extremely powerful and has great potential to reveal biological patterns and processes in poorly  
719 understood midwater ecosystems (McQuillan and Robidart, 2017). Our sampler successfully  
720 obtained large volume eDNA samples from the water column down to 400 m water depth. The  
721 sampler was mounted on *Mesobot*, a midwater robot that can operate up to 1000 m depth and  
722 track particles and animals whiling utilizing a wide variety of sensors (Yoerger et al., 2021). Our  
723 cruise was the second-ever midwater deployment of *Mesobot*. Since the 2019 cruise, the  
724 capabilities and operation readiness of the vehicle have expanded. *Mesobot* now carries machine-  
725 vision monochrome stereo cameras (Allied Vision G-319B) that enable real-time tracking of  
726 midwater targets (Yoerger et al., 2021), a color camera (Sony UMC-SC3A) that provides high-  
727 quality color video (HD or 4K) and high-resolution stills (12 MP), and a high-sensitivity  
728 radiometer (Oceanic Labs) which can measure downwelling irradiance. Thus, there is great  
729 potential to use our sampler with complementary video and environmental data to address a wide  
730 variety of midwater hypotheses (Lindsay, 2021). The approach of using *Mesobot* as an eDNA  
731 sampling platform opens up a wide range of possible experimental designs that are not possible  
732 with traditional CTD sampling, which is limited to vertical casts and the collection of limited  
733 volumes of water. Our eDNA sampler could also be integrated on to other platforms, including  
734 observational networks (Thorrold et al., 2021).

735

## 736 **5 Conclusions**

737

738 We introduced a new eDNA sampler that is capable of filtering large volumes of seawater in  
739 situ. We mounted the sampler on the midwater robot *Mesobot* and conducted three successful  
740 deployments at two sites in the Flower Garden Banks region of the Gulf of Mexico where we  
741 collected samples between 20 and 400 m water depth. We additionally sampled and analyzed  
742 eDNA from three CTD casts from the same sites and depths. While both approaches detected  
743 biodiversity patterns with depth on the scale of 10s of meters, we found that our large volume  
744 samples detected more animal taxa than our conventionally – collected small volume CTD  
745 samples. Large-volume sampling could be especially important to consider for mid and deep-  
746 water marine environments, and in any environment where eDNA is dilute or patchily –  
747 distributed, and when the detection of rare taxa is a goal.

748

## 749 **Funding**

750 This research is part of the Woods Hole Oceanographic Institution’s Ocean Twilight Zone  
751 Project, funded as part of The Audacious Project housed at TED, and a result of research funded  
752 by the National Oceanic and Atmospheric Administration's Oceanic and Atmospheric Research,  
753 Office of Ocean Exploration and Research, under award NA18OAR0110289 to Lehigh  
754 University (SH and JM co-PIs). The work of AA was supported in part by the Future Oceans Lab  
755 Acceleration Fund. The work on the sampler pumps was supported by funding from UNH  
756 Subaward No. 19-015 on NOAA Federal Award No. NA17NOS0080203 to AK.

757

## 758 **Acknowledgements**

759 We thank the Scibotics Lab (WHOI) for contributing their midwater oil samplers to the eDNA  
760 sampler development, Katie Foley (Lehigh) for assistance with CTD sample processing in the  
761 field, and James MacMillan (FGBNMS) for assistance with CTD deployments, Erin Frates  
762 (WHOI) for assistance with laboratory sample processing, Peter Wiebe (WHOI) for discussions  
763 on data analysis, and Sarah Stover (WHOI) for proof-reading the manuscript. We thank Jessica  
764 Labonté and the Ocean & Coastal Studies laboratories of Texas A&M University at Galveston  
765 for access to ultrapure water. We also thank the Flower Garden Banks National Marine  
766 Sanctuary and the captain and crew of *R/V Manta*.



767 **Table 1.** Summary of samples collected, including the *Mesobot*-mounted sampler samples and  
768 the CTD- mounted Niskin bottle samples. Additional sampling details for the *Mesobot* samples  
769 are in Supplementary Table 1 and details for the CTD samples are in Supplementary Table 2.

770

| Cast or Dive | Date    | Time (UTC) | Site        | Station     | Latitude | Longitude  | Depth range (m) | # samples |
|--------------|---------|------------|-------------|-------------|----------|------------|-----------------|-----------|
| 8            | 9/25/19 | 16:29      | Bright Bank | Bright Bank | 27.84239 | -93.268503 | 100 - 40        | 11        |
| 14           | 9/26/19 | 17:36      | Slope       | Slope       | 27.54012 | -93.35027  | 100 - 40        | 12        |
| 15           | 9/26/19 | 21:01      | Slope       | Slope       | 27.54607 | -93.38611  | 400 - 160       | 11        |
| MB009        | 9/25/19 | 15:25      | Bright Bank | Bright Bank | 27.8485  | -93.2576   | 20 - 120        | 12        |
| MB011        | 9/26/19 | 17:11      | Slope       | Slope       | 27.53905 | -93.34029  | 200 - 400       | 12        |
| MB012        | 9/26/19 | 23:29      | Slope       | Slope       | 27.53905 | -93.34029  | 40 - 320        | 12        |

771

772

773 **Table 2.** Metazoan sequence summary.

774

|                                   | <b><i>Mesobot-Inner</i></b> | <b><i>Mesobot-Outer</i></b> | <b>CTD</b> |
|-----------------------------------|-----------------------------|-----------------------------|------------|
| <b># samples</b>                  | 36                          | 36                          | 34         |
| <b># sequences (total)</b>        | 582,246                     | 2,700,417                   | 1,477,377  |
| <b># ASVs</b>                     | 703                         | 1096                        | 517        |
| <b>Minimum # sequences/sample</b> | 3                           | 25,350                      | 3,354      |
| <b>Maximum # sequences/sample</b> | 68,149                      | 207,391                     | 99,996     |
| <b>Mean # sequences/sample</b>    | 16,173.5                    | 75,012                      | 43,452     |

775

776

777 **Table 3.** Number of Level-7 taxa at in CTD and *Mesobot* samples from common sites/depths  
 778 from A) comparisons between 2 sample sets; and B) comparisons between 3 samples sets. \*CTD  
 779 filter volumes not measured; approximations assume 2.2 liters per bottle.

780 **A.**

| Site        | Depth (m) | # taxa shared | # taxa unique to CTD samples | # taxa unique to <i>Mesobot</i> samples | Sample volume (l) |        |
|-------------|-----------|---------------|------------------------------|-----------------------------------------|-------------------|--------|
|             |           |               |                              |                                         | CTD:              | MB:    |
| Bright Bank | 40        | 29            | 2                            | 40                                      | CTD:              | 6.84   |
|             |           |               |                              |                                         | MB:               | 120.95 |
|             | 60        | 27            | 6                            | 30                                      | CTD:              | 6.82   |
|             |           |               |                              |                                         | MB:               | 129.96 |
|             | 80        | 25            | 12                           | 34                                      | CTD:              | 6.41   |
|             |           |               |                              |                                         | MB:               | 122.15 |
| 100         | 22        | 5             | 33                           | CTD:                                    | 4.4               |        |
|             |           |               |                              | MB:                                     | 122.17            |        |
| Slope       | 40        | 28            | 3                            | 30                                      | CTD:              | 7.2    |
|             |           |               |                              |                                         | MB:               | 85.91  |
|             | 60        | 22            | 0                            | 28                                      | CTD:              | 7.16   |
|             |           |               |                              |                                         | MB:               | 79.96  |
|             | 80        | 22            | 11                           | 29                                      | CTD:              | 5.9    |
|             |           |               |                              |                                         | MB:               | 88.29  |
|             | 100       | 24            | 9                            | 25                                      | CTD:              | 7.02   |
|             |           |               |                              |                                         | MB:               | 86.1   |
|             | 240       | 33            | 23                           | 9                                       | CTD:              | 6.91   |
|             |           |               |                              |                                         | MB:               | 125.71 |
|             | 400       | 24            | 10                           | 45                                      | CTD:              | ~4.4*  |
|             |           |               |                              |                                         | MB:               | 119.38 |

781

782 **B.**

| Slope                                                        | Depth (m) | # taxa shared-all | # taxa shared CTD-MB011 | # taxa shared CTD-MB012 | # taxa shared MB011-MB012 | # taxa unique to CTD | # taxa unique to MB011 | # taxa unique to MB012 |
|--------------------------------------------------------------|-----------|-------------------|-------------------------|-------------------------|---------------------------|----------------------|------------------------|------------------------|
|                                                              |           |                   |                         |                         |                           |                      |                        |                        |
| Sample volumes (l): CTD: ~6.6*; MB011: 120.45; MB012: 120.62 |           |                   |                         |                         |                           |                      |                        |                        |

783

784 **References**

- 785 Allan, E.A., DiBenedetto, M.H., Lavery, A.C., Govindarajan, A.F., Zhang, W.G., 2021.  
786 Modeling characterization of the vertical and temporal variability of environmental DNA  
787 in the mesopelagic ocean. *Sci Rep* 11, 21273. [https://doi.org/10.1038/s41598-021-00288-](https://doi.org/10.1038/s41598-021-00288-5)  
788 5
- 789 Amaral-Zettler, L.A., McCliment, E.A., Ducklow, H.W., Huse, S.M., 2009. A Method for  
790 Studying Protistan Diversity Using Massively Parallel Sequencing of V9 Hypervariable  
791 Regions of Small-Subunit Ribosomal RNA Genes. *PLOS ONE* 4, e6372.  
792 <https://doi.org/10.1371/journal.pone.0006372>
- 793 Andruszkiewicz, E.A., Starks, H.A., Chavez, F.P., Sassoubre, L.M., Block, B.A., Boehm, A.B.,  
794 2017. Biomonitoring of marine vertebrates in Monterey Bay using eDNA metabarcoding.  
795 *PLOS ONE* 12, e0176343. <https://doi.org/10.1371/journal.pone.0176343>
- 796 Beentjes, K.K., Speksnijder, A.G.C.L., Schilthuizen, M., Hoogeveen, M., Hoorn, B.B. van der,  
797 2019. The effects of spatial and temporal replicate sampling on eDNA metabarcoding.  
798 *PeerJ* 7, e7335. <https://doi.org/10.7717/peerj.7335>
- 799 Bessey, C., Jarman, S.N., Berry, O., Olsen, Y.S., Bunce, M., Simpson, T., Power, M.,  
800 McLaughlin, J., Edgar, G.J. Keesing, J. 2020. Maximizing fish detection with eDNA  
801 metabarcoding. *Environmental DNA* 2, 493-504.  
802 <https://onlinelibrary.wiley.com/doi/full/10.1002/edn3.74> (accessed 12.28.21)
- 803 Billings, A., Kaiser, C., Young, C.M., Hiebert, L.S., Cole, E., Wagner, J.K.S., Van Dover, C.L.,  
804 2017. SyPRID sampler: A large-volume, high-resolution, autonomous, deep-ocean  
805 precision plankton sampling system. *Deep Sea Research Part II: Topical Studies in*

806 Oceanography, Advances in deep-sea biology: biodiversity, ecosystem functioning and  
807 conservation 137, 297–306. <https://doi.org/10.1016/j.dsr2.2016.05.007>

808 Blanco-Bercial, L., 2020. Metabarcoding Analyses and Seasonality of the Zooplankton  
809 Community at BATS. *Front. Mar. Sci.* 7. <https://doi.org/10.3389/fmars.2020.00173>

810 Bokulich, N.A., Kaehler, B.D., Rideout, J.R., Dillon, M., Bolyen, E., Knight, R., Huttley, G.A.,  
811 Gregory Caporaso, J., 2018. Optimizing taxonomic classification of marker-gene  
812 amplicon sequences with QIIME 2's q2-feature-classifier plugin. *Microbiome* 6, 90.  
813 <https://doi.org/10.1186/s40168-018-0470-z>

814 Bolyen, E., Rideout, J.R., Dillon, M.R., Bokulich, N.A., Abnet, C.C., Al-Ghalith, G.A.,  
815 Alexander, H., Alm, E.J., Arumugam, M., Asnicar, F., Bai, Y., Bisanz, J.E., Bittinger, K.,  
816 Brejnrod, A., Brislawn, C.J., Brown, C.T., Callahan, B.J., Caraballo-Rodríguez, A.M.,  
817 Chase, J., Cope, E.K., Da Silva, R., Diener, C., Dorrestein, P.C., Douglas, G.M., Durall,  
818 D.M., Duvall, C., Edwardson, C.F., Ernst, M., Estaki, M., Fouquier, J., Gauglitz, J.M.,  
819 Gibbons, S.M., Gibson, D.L., Gonzalez, A., Gorlick, K., Guo, J., Hillmann, B., Holmes,  
820 S., Holste, H., Huttenhower, C., Huttley, G.A., Janssen, S., Jarmusch, A.K., Jiang, L.,  
821 Kaehler, B.D., Kang, K.B., Keefe, C.R., Keim, P., Kelley, S.T., Knights, D., Koester, I.,  
822 Kosciolk, T., Kreps, J., Langille, M.G.I., Lee, J., Ley, R., Liu, Y.-X., Loftfield, E.,  
823 Lozupone, C., Maher, M., Marotz, C., Martin, B.D., McDonald, D., McIver, L.J., Melnik,  
824 A.V., Metcalf, J.L., Morgan, S.C., Morton, J.T., Naimey, A.T., Navas-Molina, J.A.,  
825 Nothias, L.F., Orchanian, S.B., Pearson, T., Peoples, S.L., Petras, D., Preuss, M.L.,  
826 Priesse, E., Rasmussen, L.B., Rivers, A., Robeson, M.S., Rosenthal, P., Segata, N.,  
827 Shaffer, M., Shiffer, A., Sinha, R., Song, S.J., Spear, J.R., Swafford, A.D., Thompson,  
828 L.R., Torres, P.J., Trinh, P., Tripathi, A., Turnbaugh, P.J., Ul-Hasan, S., van der Hooft,

829 J.J.J., Vargas, F., Vázquez-Baeza, Y., Vogtmann, E., von Hippel, M., Walters, W., Wan,  
830 Y., Wang, M., Warren, J., Weber, K.C., Williamson, C.H.D., Willis, A.D., Xu, Z.Z.,  
831 Zaneveld, J.R., Zhang, Y., Zhu, Q., Knight, R., Caporaso, J.G., 2019. Reproducible,  
832 interactive, scalable and extensible microbiome data science using QIIME 2. *Nat*  
833 *Biotechnol* 37, 852–857. <https://doi.org/10.1038/s41587-019-0209-9>

834 Brito-Morales, I., Schoeman, D.S., Molinos, J.G., Burrows, M.T., Klein, C.J., Arafeh-Dalmau,  
835 N., Kaschner, K., Garilao, C., Kesner-Reyes, K., Richardson, A.J., 2020. Climate  
836 velocity reveals increasing exposure of deep-ocean biodiversity to future warming. *Nat.*  
837 *Clim. Chang.* 10, 576–581. <https://doi.org/10.1038/s41558-020-0773-5>

838 Bucklin, A., Lindeque, P.K., Rodriguez-Ezpeleta, N., Albaina, A., Lehtiniemi, M., 2016.  
839 Metabarcoding of marine zooplankton: prospects, progress and pitfalls. *J Plankton Res*  
840 38, 393–400. <https://doi.org/10.1093/plankt/fbw023>

841 Bucklin, A., Yeh, H.D., Questel, J.M., Richardson, D.E., Reese, B., Copley, N.J., Wiebe, P.H.,  
842 2019. Time-series metabarcoding analysis of zooplankton diversity of the NW Atlantic  
843 continental shelf. *ICES J Mar Sci* 76, 1162–1176. <https://doi.org/10.1093/icesjms/fsz021>

844 Callahan, B.J., McMurdie, P.J., Rosen, M.J., Han, A.W., Johnson, A.J.A., Holmes, S.P., 2016.  
845 DADA2: High-resolution sample inference from Illumina amplicon data. *Nature Methods*  
846 13, 581–583. <https://doi.org/10.1038/nmeth.3869>

847 Canals, O., Mendibil, I., Santos, M., Irigoien, X., Rodríguez-Ezpeleta, N., 2021. Vertical  
848 stratification of environmental DNA in the open ocean captures ecological patterns and  
849 behavior of deep-sea fishes. *Limnology and Oceanography Letters* 6, 339–347.  
850 <https://doi.org/10.1002/lol2.10213>

- 851 Chen, B., Masunaga, E., Smith, S.L., Yamazaki, H., 2021. Diel vertical migration promotes  
852 zooplankton horizontal patchiness. *J Oceanogr* 77, 123–135.  
853 <https://doi.org/10.1007/s10872-020-00564-4>
- 854 Closek, C.J., Santora, J.A., Starks, H.A., Schroeder, I.D., Andruszkiewicz, E.A., Sakuma, K.M.,  
855 Bograd, S.J., Hazen, E.L., Field, J.C., Boehm, A.B., 2019. Marine Vertebrate  
856 Biodiversity and Distribution Within the Central California Current Using Environmental  
857 DNA (eDNA) Metabarcoding and Ecosystem Surveys. *Frontiers in Marine Science* 6,  
858 732. <https://doi.org/10.3389/fmars.2019.00732>
- 859 Dennis, G.D., Bright, T.J., 1988. Reef Fish Assemblages on Hard Banks in the Northwestern  
860 Gulf of Mexico. *Bulletin of Marine Science* 43, 280–307.
- 861 Dickie, I.A., Boyer, S., Buckley, H.L., Duncan, R.P., Gardner, P.P., Hogg, I.D., Holdaway, R.J.,  
862 Lear, G., Makiola, A., Morales, S.E., Powell, J.R., Weaver, L., 2018. Towards robust and  
863 repeatable sampling methods in eDNA-based studies. *Molecular Ecology Resources* 18,  
864 940–952. <https://doi.org/10.1111/1755-0998.12907>
- 865 Djurhuus, A., Pitz, K., Sawaya, N.A., Rojas-Márquez, J., Michaud, B., Montes, E.,  
866 Muller-Karger, F., Breitbart, M., 2018. Evaluation of marine zooplankton community  
867 structure through environmental DNA metabarcoding. *Limnology and Oceanography:*  
868 *Methods* 16, 209–221. <https://doi.org/10.1002/lom3.10237>
- 869 Easson, C.G., Boswell, K.M., Tucker, N., Warren, J.D., Lopez, J.V., 2020. Combined eDNA and  
870 Acoustic Analysis Reflects Diel Vertical Migration of Mixed Consortia in the Gulf of  
871 Mexico. *Frontiers in Marine Science* 7, 552. <https://doi.org/10.3389/fmars.2020.00552>
- 872 Everett, M.V., Park, L.K., 2018. Exploring deep-water coral communities using environmental  
873 DNA. *Deep Sea Research Part II: Topical Studies in Oceanography, Results of*

- 874           Telepresence-Enabled Oceanographic Exploration 150, 229–241.
- 875           <https://doi.org/10.1016/j.dsr2.2017.09.008>
- 876   Ficetola, G.F., Pansu, J., Bonin, A., Coissac, E., Giguet-Covex, C., De Barba, M., Gielly, L.,  
877           Lopes, C.M., Boyer, F., Pompanon, F., Rayé, G., Taberlet, P., 2015. Replication levels,  
878           false presences and the estimation of the presence/absence from eDNA metabarcoding  
879           data. *Molecular Ecology Resources* 15, 543–556. [https://doi.org/10.1111/1755-](https://doi.org/10.1111/1755-0998.12338)  
880           0998.12338
- 881   Gallego, R., Jacobs-Palmer, E., Cribari, K., Kelly, R.P., 2020. Environmental DNA  
882           metabarcoding reveals winners and losers of global change in coastal waters. *Proceedings*  
883           of the Royal Society B: Biological Sciences 287, 20202424.  
884           <https://doi.org/10.1098/rspb.2020.2424>
- 885   Gilbey, J., Carvalho, G., Castilho, R., Coscia, I., Coulson, M.W., Dahle, G., Derycke, S.,  
886           Francisco, S.M., Helyar, S.J., Johansen, T., Junge, C., Layton, K.K.S., Martinsohn, J.,  
887           Matejusova, I., Robalo, J.I., Rodríguez-Ezpeleta, N., Silva, G., Strammer, I., Vasemägi,  
888           A., Volckaert, F.A.M., 2021. Life in a drop: Sampling environmental DNA for marine  
889           fishery management and ecosystem monitoring. *Marine Policy* 124, 104331.  
890           <https://doi.org/10.1016/j.marpol.2020.104331>
- 891   Goldberg, C.S., Turner, C.R., Deiner, K., Klymus, K.E., Thomsen, P.F., Murphy, M.A., Spear,  
892           S.F., McKee, A., Oyler-McCance, S.J., Cornman, R.S., Laramie, M.B., Mahon, A.R.,  
893           Lance, R.F., Pilliod, D.S., Strickler, K.M., Waits, L.P., Fremier, A.K., Takahara, T.,  
894           Herder, J.E., Taberlet, P., 2016. Critical considerations for the application of  
895           environmental DNA methods to detect aquatic species. *Methods in Ecology and*  
896           *Evolution* 7, 1299–1307. <https://doi.org/10.1111/2041-210X.12595>



- 897 Govindarajan, A.F., Francolini, R.D., Jech, J.M., Lavery, A.C., Llopiz, J.K., Wiebe, P.H., Zhang,  
898 W. (Gordon), 2021. Exploring the Use of Environmental DNA (eDNA) to Detect Animal  
899 Taxa in the Mesopelagic Zone. *Front. Ecol. Evol.* 9, 574877.  
900 <https://doi.org/10.3389/fevo.2021.574877>
- 901 Govindarajan, A.F., Pineda, J., Purcell, M., Breier, J.A., 2015. Species- and stage-specific  
902 barnacle larval distributions obtained from AUV sampling and genetic analysis in  
903 Buzzards Bay, Massachusetts, USA. *Journal of Experimental Marine Biology and*  
904 *Ecology* 472, 158–165. <https://doi.org/10.1016/j.jembe.2015.07.012>
- 905 Hestetun, J.T., Lanzén, A., Dahlgren, T.G., 2021. Grab what you can—an evaluation of spatial  
906 replication to decrease heterogeneity in sediment eDNA metabarcoding. *PeerJ* 9, e11619.  
907 <https://doi.org/10.7717/peerj.11619>
- 908 Jo, T., Arimoto, M., Murakami, H., Masuda, R., Minamoto, T., 2019. Particle Size Distribution  
909 of Environmental DNA from the Nuclei of Marine Fish. *Environ. Sci. Technol.* 53, 9947–  
910 9956. <https://doi.org/10.1021/acs.est.9b02833>
- 911 Laroche, O., Kersten, O., Smith, C.R., Goetze, E., 2020. Environmental DNA surveys detect  
912 distinct metazoan communities across abyssal plains and seamounts in the western  
913 Clarion Clipperton Zone. *Molecular Ecology* 29, 4588–4604.  
914 <https://doi.org/10.1111/mec.15484>
- 915 Lindsay, D.J., 2021. Stealthy tracking of deep ocean organisms with Mesobot. *Science Robotics*  
916 6, eabj3949. <https://doi.org/10.1126/scirobotics.abj3949>
- 917 Mächler, E., Deiner, K., Spahn, F., Altermatt, F., 2016. Fishing in the Water: Effect of Sampled  
918 Water Volume on Environmental DNA-Based Detection of Macroinvertebrates. *Environ.*  
919 *Sci. Technol.* 50, 305–312. <https://doi.org/10.1021/acs.est.5b04188>

- 920 McClenaghan, B., Fahner, N., Cote, D., Chawarski, J., McCarthy, A., Rajabi, H., Singer, G.,  
921 Hajibabaei, M., 2020. Harnessing the power of eDNA metabarcoding for the detection of  
922 deep-sea fishes. PLOS ONE 15, e0236540. <https://doi.org/10.1371/journal.pone.0236540>
- 923 McQuillan, J.S., Robidart, J.C., 2017. Molecular-biological sensing in aquatic environments:  
924 recent developments and emerging capabilities. Current Opinion in Biotechnology,  
925 Energy biotechnology • Environmental biotechnology 45, 43–50.  
926 <https://doi.org/10.1016/j.copbio.2016.11.022>
- 927 Merten, V., Bayer, T., Reusch, T.B.H., Puebla, O., Fuss, J., Stefanschitz, J., Lischka, A., Hauss,  
928 H., Neitzel, P., Piatkowski, U., Czudaj, S., Christiansen, B., Denda, A., Hoving, H.-J.T.,  
929 2021. An Integrative Assessment Combining Deep-Sea Net Sampling, in situ  
930 Observations and Environmental DNA Analysis Identifies Cabo Verde as a Cephalopod  
931 Biodiversity Hotspot in the Atlantic Ocean. Frontiers in Marine Science 9, Art.Nr.  
932 760108. <https://doi.org/10.3389/fmars.2021.760108>
- 933 Miya, M., Sato, Y., Fukunaga, T., Sado, T., Poulsen, J.Y., Sato, K., Minamoto, T., Yamamoto,  
934 S., Yamanaka, H., Araki, H., Kondoh, M., Iwasaki, W., n.d. MiFish, a set of universal  
935 PCR primers for metabarcoding environmental DNA from fishes: detection of more than  
936 230 subtropical marine species. Royal Society Open Science 2, 150088.  
937 <https://doi.org/10.1098/rsos.150088>
- 938 Moushomi, R., Wilgar, G., Carvalho, G., Creer, S., Seymour, M., 2019. Environmental DNA  
939 size sorting and degradation experiment indicates the state of *Daphnia magna*  
940 mitochondrial and nuclear eDNA is subcellular. Sci Rep 9, 12500.  
941 <https://doi.org/10.1038/s41598-019-48984-7>

942 Oksanen J, Blanchet FG, Friendly M, Kindt R, Legendre P, McGlenn D, Minchin PR, O'hara  
943 RB, Simpson GL, Solymos P, Stevens MH, 2016. *vegan: Community Ecology Package*.  
944 R package version 2.4-3. Vienna: R Foundation for Statistical Computing.

945 Quast, C., Pruesse, E., Yilmaz, P., Gerken, J., Schweer, T., Yarza, P., Peplies, J., Glöckner, F.O.,  
946 2013. The SILVA ribosomal RNA gene database project: improved data processing and  
947 web-based tools. *Nucleic Acids Res* 41, D590–D596. <https://doi.org/10.1093/nar/gks1219>

948 Ricker, W.E., 1973. Linear Regressions in Fishery Research. *Journal of the Fisheries Board of*  
949 *Canada*. <https://doi.org/10.1139/f73-072>

950 Ruppert, K.M., Kline, R.J., Rahman, M.S., 2019. Past, present, and future perspectives of  
951 environmental DNA (eDNA) metabarcoding: A systematic review in methods,  
952 monitoring, and applications of global eDNA. *Global Ecology and Conservation* 17,  
953 e00547. <https://doi.org/10.1016/j.gecco.2019.e00547>

954 Sala, E., Mayorga, J., Bradley, D., Cabral, R.B., Atwood, T.B., Auber, A., Cheung, W., Costello,  
955 C., Ferretti, F., Friedlander, A.M., Gaines, S.D., Garilao, C., Goodell, W., Halpern, B.S.,  
956 Hinson, A., Kaschner, K., Kesner-Reyes, K., Leprieur, F., McGowan, J., Morgan, L.E.,  
957 Mouillot, D., Palacios-Abrantes, J., Possingham, H.P., Rechberger, K.D., Worm, B.,  
958 Lubchenco, J., 2021. Protecting the global ocean for biodiversity, food and climate.  
959 *Nature* 592, 397–402. <https://doi.org/10.1038/s41586-021-03371-z>

960 Sammarco, P., Nuttall, M., Beltz, D., Hickerson, E., Schmahl, G.P., 2016. Patterns of  
961 Mesophotic Benthic Community Structure on Banks Off vs Inside the Continental Shelf  
962 Edge, Gulf of Mexico. *Gulf of Mexico Science* 33.  
963 <https://doi.org/10.18785/goms.3301.07>

- 964 Sawaya, N.A., Djurhuus, A., Closek, C.J., Hepner, M., Olesin, E., Visser, L., Kelble, C.,  
965 Hubbard, K., Breitbart, M., 2019. Assessing eukaryotic biodiversity in the Florida Keys  
966 National Marine Sanctuary through environmental DNA metabarcoding. *Ecology and*  
967 *Evolution* 9, 1029–1040. <https://doi.org/10.1002/ece3.4742>
- 968 Schabacker, J.C., Amish, S.J., Ellis, B.K., Gardner, B., Miller, D.L., Rutledge, E.A., Sepulveda,  
969 A.J., Luikart, G., 2020. Increased eDNA detection sensitivity using a novel high-volume  
970 water sampling method. *Environmental DNA* 2, 244–251.  
971 <https://doi.org/10.1002/edn3.63>
- 972 Sepulveda, A.J., Schabacker, J., Smith, S., Al-Chokhachy, R., Luikart, G., Amish, S.J., 2019.  
973 Improved detection of rare, endangered and invasive trout in using a new large-volume  
974 sampling method for eDNA capture. *Environmental DNA* 1, 227–237.  
975 <https://doi.org/10.1002/edn3.23>
- 976 St John, M.A., Borja, A., Chust, G., Heath, M., Grigorov, I., Mariani, P., Martin, A.P., Santos,  
977 R.S., 2016. A dark hole in our understanding of marine ecosystems and their services:  
978 Perspectives from the mesopelagic community. *Front. Mar. Sci.* 3.  
979 <https://doi.org/10.3389/fmars.2016.00031>
- 980 Stoeckle, M.Y., Adolf, J., Charlop-Powers, Z., Dunton, K.J., Hinks, G., VanMorter, S.M., 2021.  
981 Trawl and eDNA assessment of marine fish diversity, seasonality, and relative abundance  
982 in coastal New Jersey, USA. *ICES Journal of Marine Science* 78, 293–304.  
983 <https://doi.org/10.1093/icesjms/fsaa225>
- 984 Thorrold, S.R., Adams, A., Bucklin, A., Buesseler, K., Fischer, G., Govindarajan, A., Hoagland,  
985 P., Jin, D., Lavery, A., Llopez, J., Madin, L., Omand, M., Renaud, P.G., Sosik, H.M.,  
986 Wiebe, P., Yoerger, D.R., Zhang, W. (Gordon), 2021. Twilight Zone Observation

- 987 Network: A distributed observation network for sustained, real-time interrogation of the  
988 ocean's twilight zone. *Marine Technology Society Journal* 55, 92–93.  
989 <https://doi.org/10.4031/MTSJ.55.3.46>
- 990 Turner, C.R., Barnes, M.A., Xu, C.C.Y., Jones, S.E., Jerde, C.L., Lodge, D.M., 2014. Particle  
991 size distribution and optimal capture of aqueous microbial eDNA. *Methods in Ecology*  
992 *and Evolution* 5, 676–684. <https://doi.org/10.1111/2041-210X.12206>
- 993 Wittwer, C., Nowak, C., Strand, D.A., Vrålstad, T., Thines, M., Stoll, S., 2018. Comparison of  
994 two water sampling approaches for eDNA-based crayfish plague detection. *Limnologica*  
995 70, 1–9. <https://doi.org/10.1016/j.limno.2018.03.001>
- 996 Worm, B., Lotze, H.K., 2021. Chapter 21 - Marine biodiversity and climate change, in: Letcher,  
997 T.M. (Ed.), *Climate Change (Third Edition)*. Elsevier, pp. 445–464.  
998 <https://doi.org/10.1016/B978-0-12-821575-3.00021-9>
- 999 Wu, S., Xiong, J., Yu, Y., 2015. Taxonomic Resolutions Based on 18S rRNA Genes: A Case  
1000 Study of Subclass Copepoda. *PLoS One* 10.  
1001 <https://doi.org/10.1371/journal.pone.0131498>
- 1002 Yamahara, K.M., Preston, C.M., Birch, J., Walz, K., Marin, R., Jensen, S., Pargett, D., Roman,  
1003 B., Ussler, W., Zhang, Y., Ryan, J., Hobson, B., Kieft, B., Raanan, B., Goodwin, K.D.,  
1004 Chavez, F.P., Scholin, C., 2019. In situ Autonomous Acquisition and Preservation of  
1005 Marine Environmental DNA Using an Autonomous Underwater Vehicle. *Frontiers in*  
1006 *Marine Science* 6, 373. <https://doi.org/10.3389/fmars.2019.00373>
- 1007 Yoerger, Dana R., Govindarajan, A.F., Howland, J.C., Llopiz, J.K., Wiebe, P.H., Curran, M.,  
1008 Fujii, J., Gomez-Ibanez, D., Katija, K., Robison, B.H., Hobson, B.W., Risi, M., Rock,

1009 S.M., 2021. A hybrid underwater robot for multidisciplinary investigation of the ocean  
1010 twilight zone. Science Robotics. <https://doi.org/10.1126/scirobotics.abe1901>  
1011  
1012

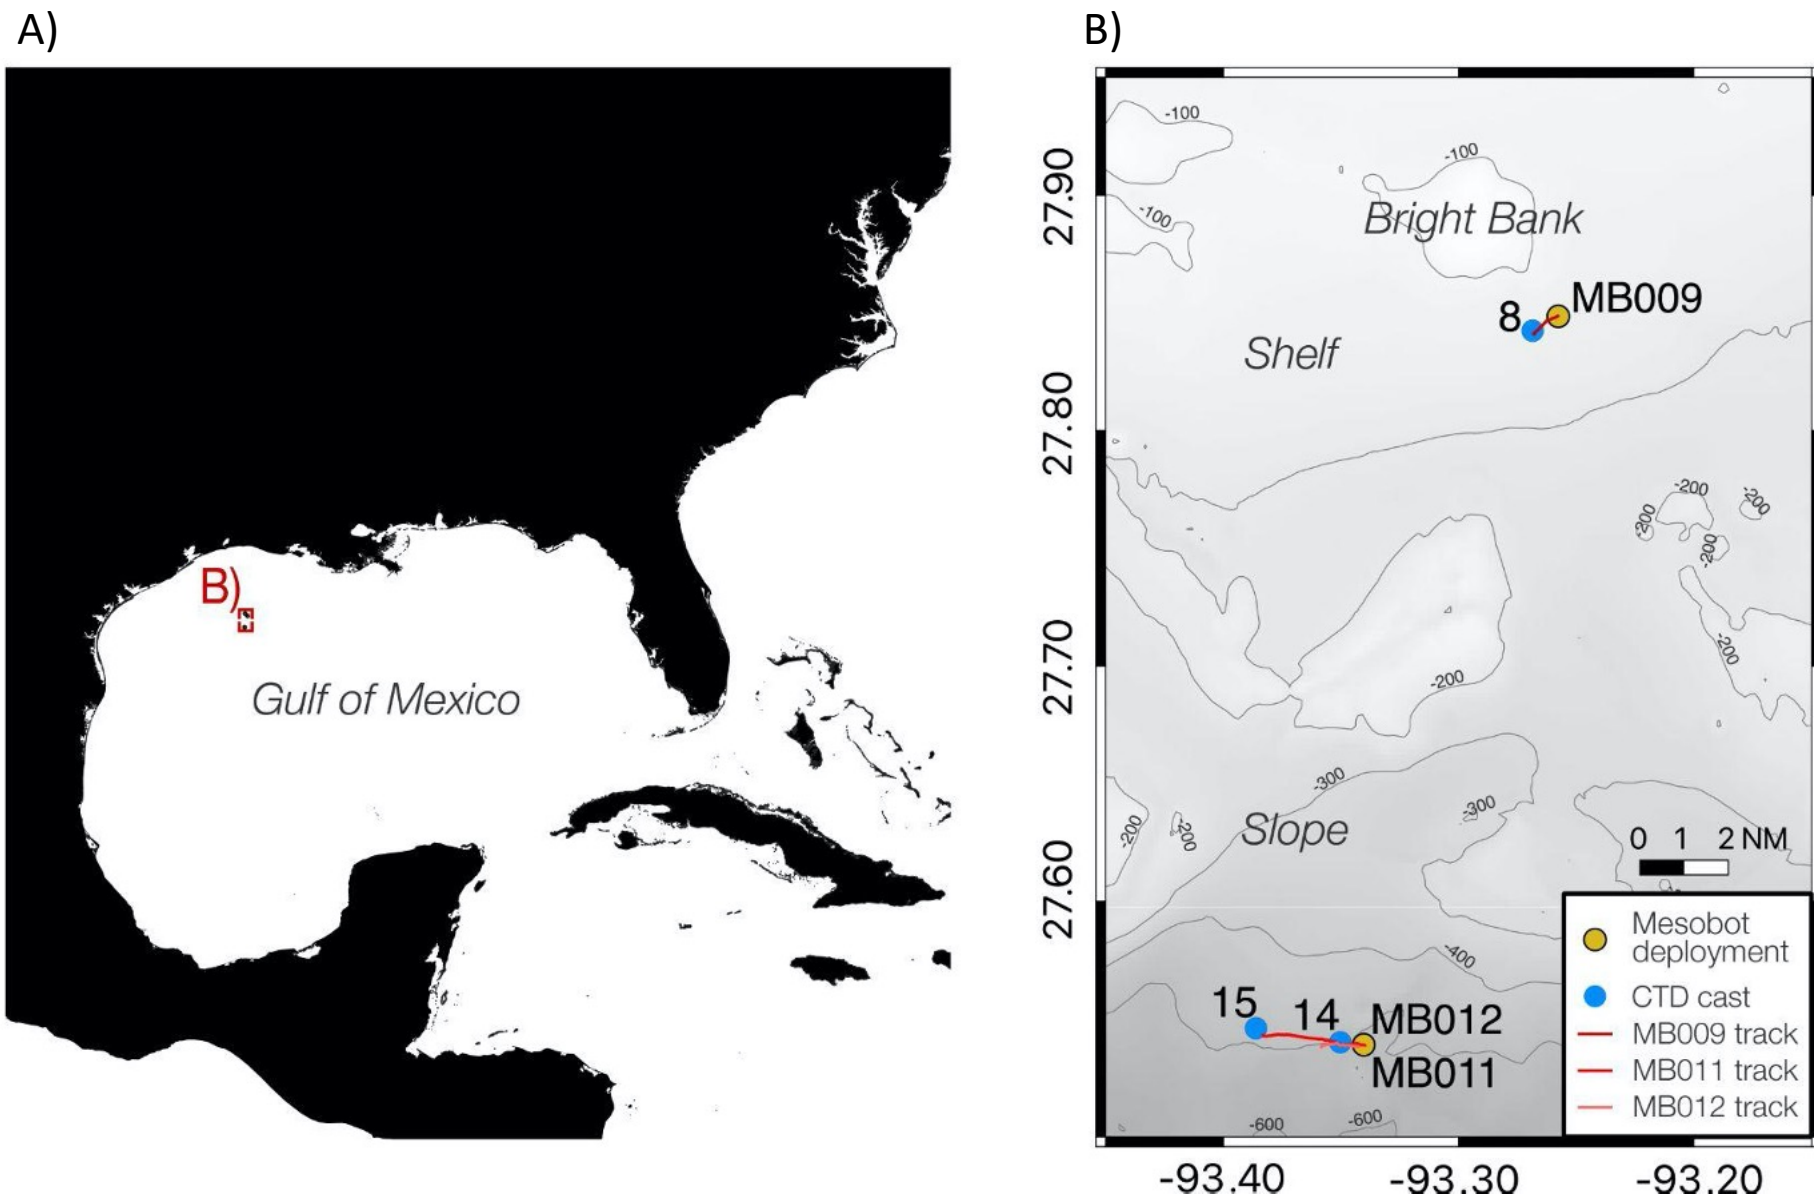

**Fig. 1.** Map of study area. A) location in the Gulf of Mexico; B) close up of study area including Bright Bank and the deeper site. Blue dots indicate CTD locations and yellow dots indicate *Mesobot* deployment locations (MB009, MB011, and MB012). Red lines indicate the *Mesobot* tracks.



A.

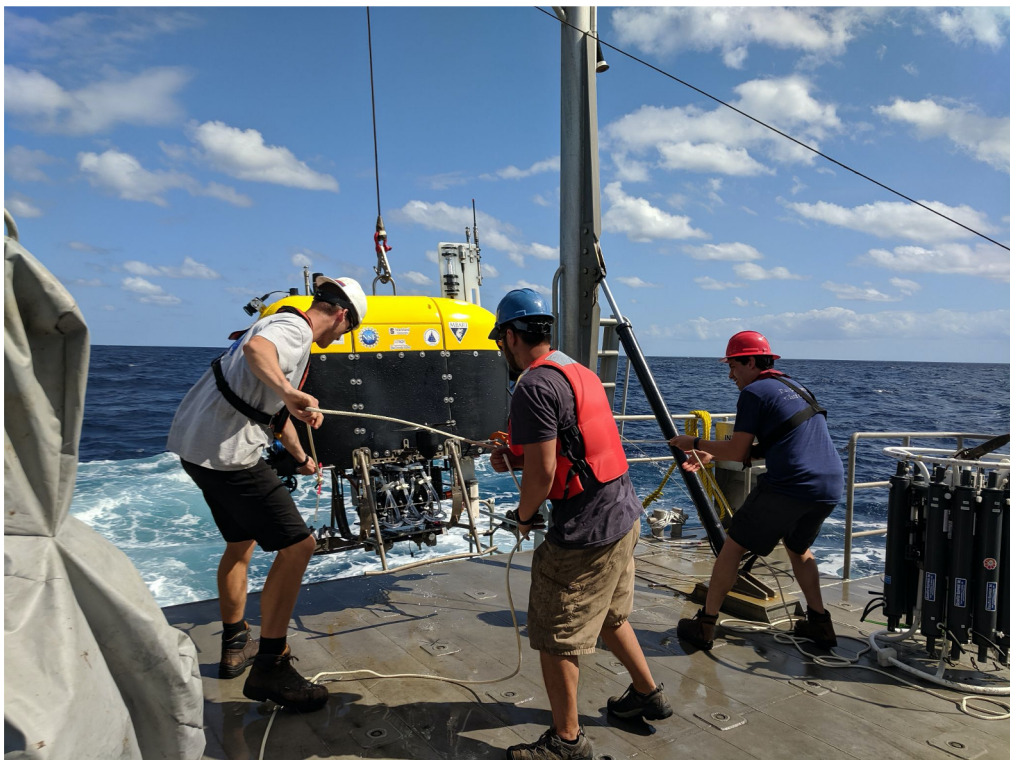

B.

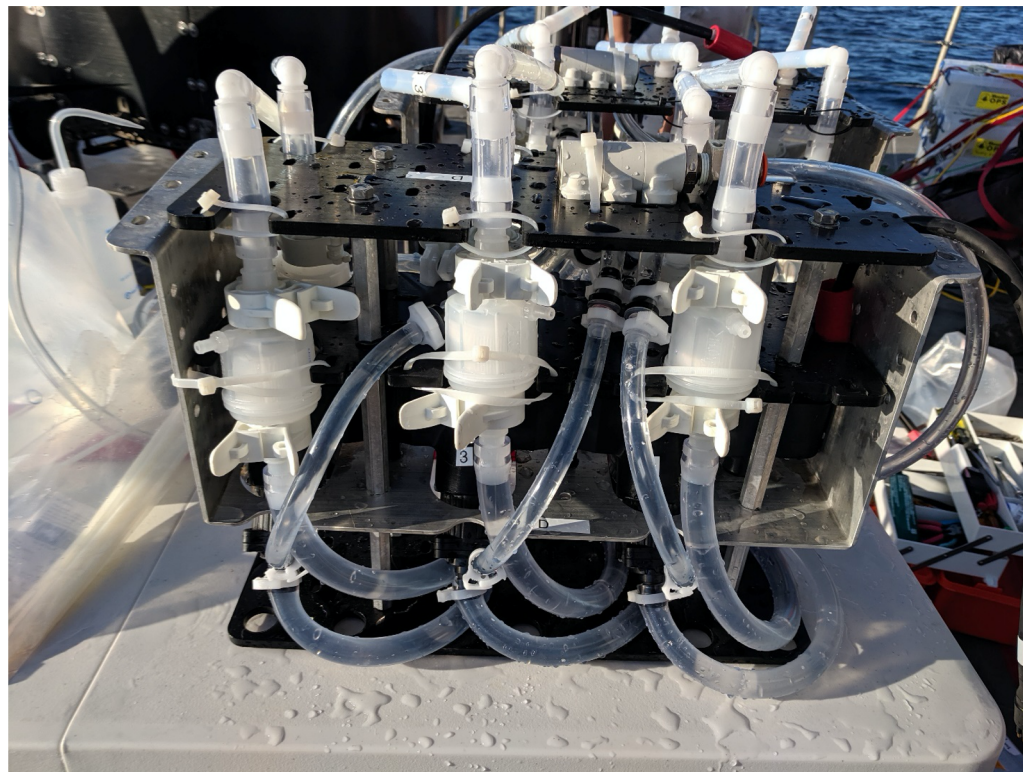

**Fig. 2.** A) *Mesobot* with the eDNA sampler being retrieved after a deployment on the R/V Manta; B) close-up of the eDNA sampler.



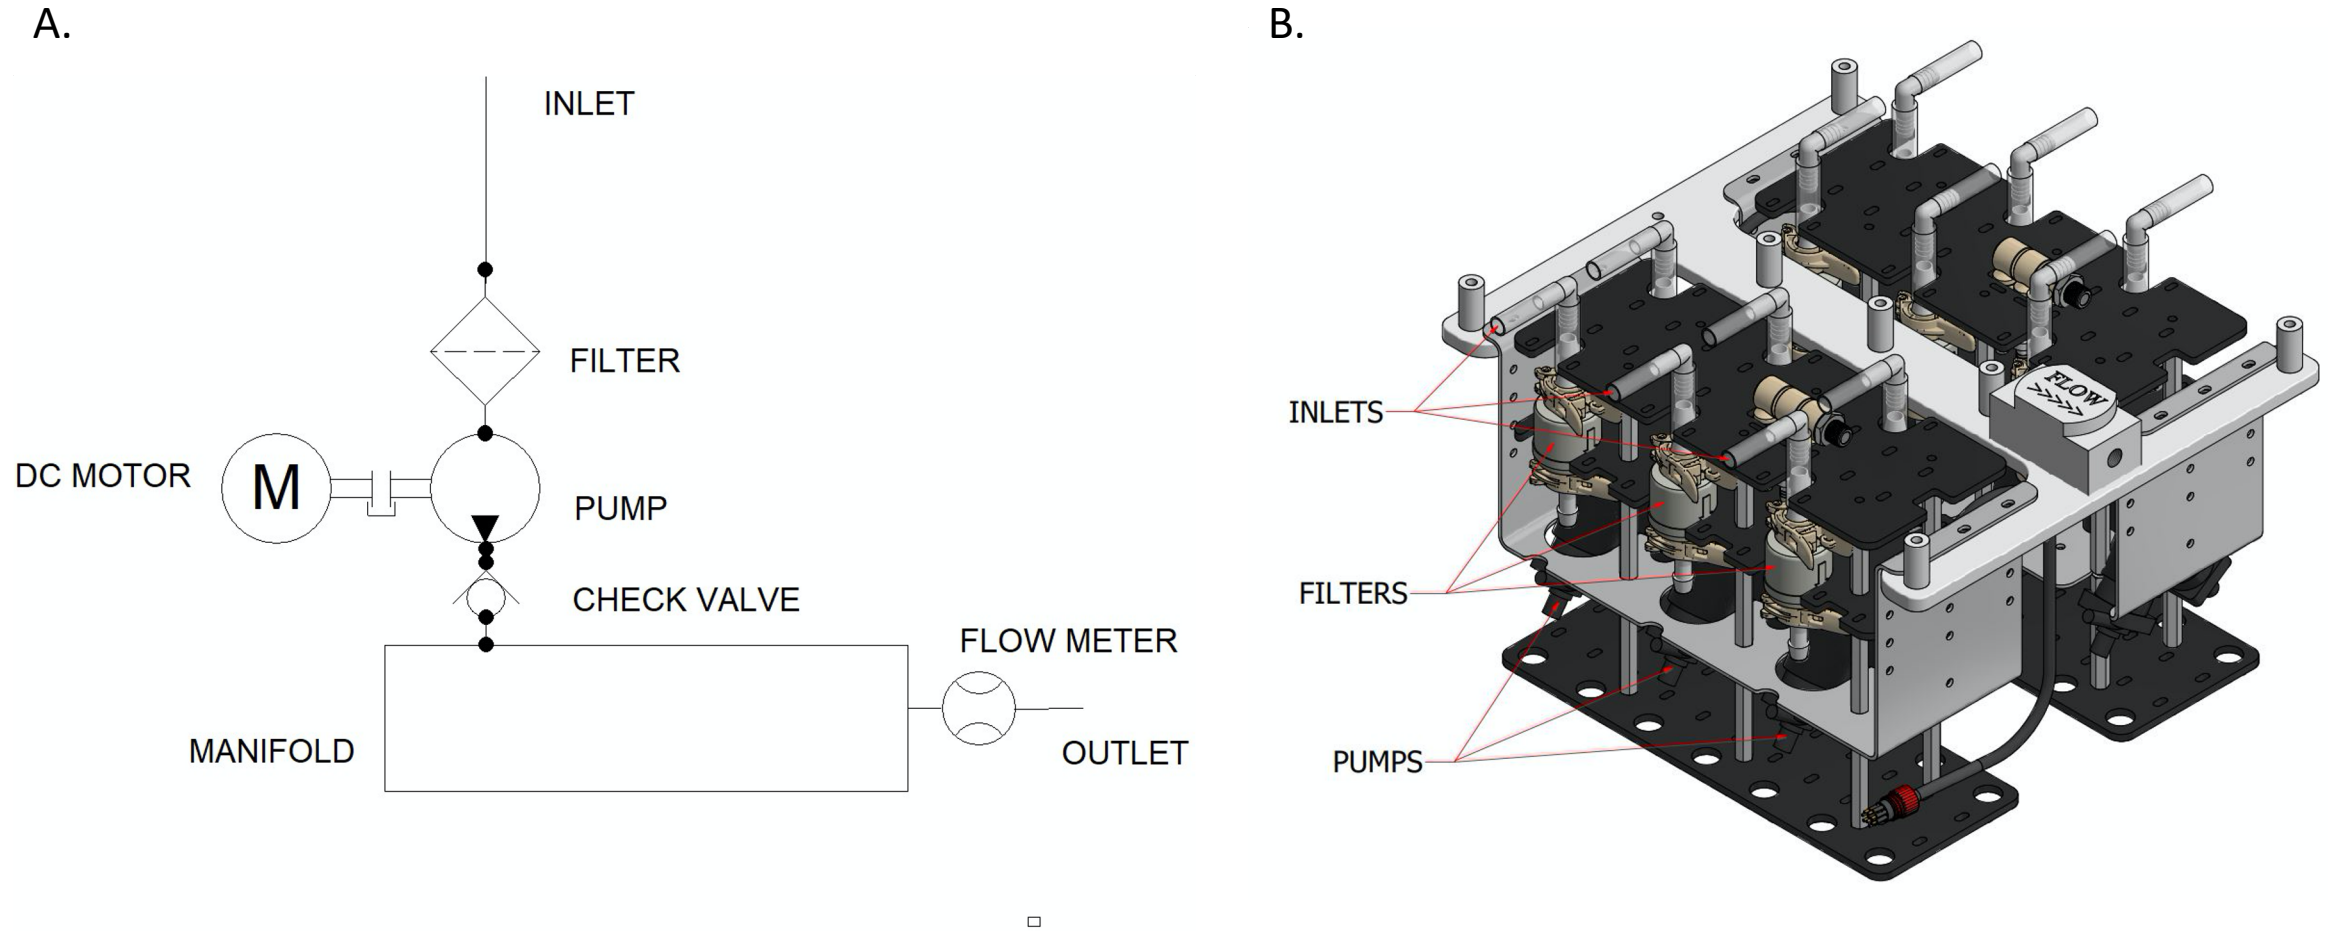

**Fig. 3.** Sampler design. A) Schematic of one pump/filter channel. Each sampler has 6 such channels that flow into a common manifold with an outlet through a single flowmeter. All 6 pumps are controlled by a single microcontroller; B) CAD drawing of the complete sampler. *Mesobot* carried two such samplers for a total of 12 pump/filter units on each dive.

**A.**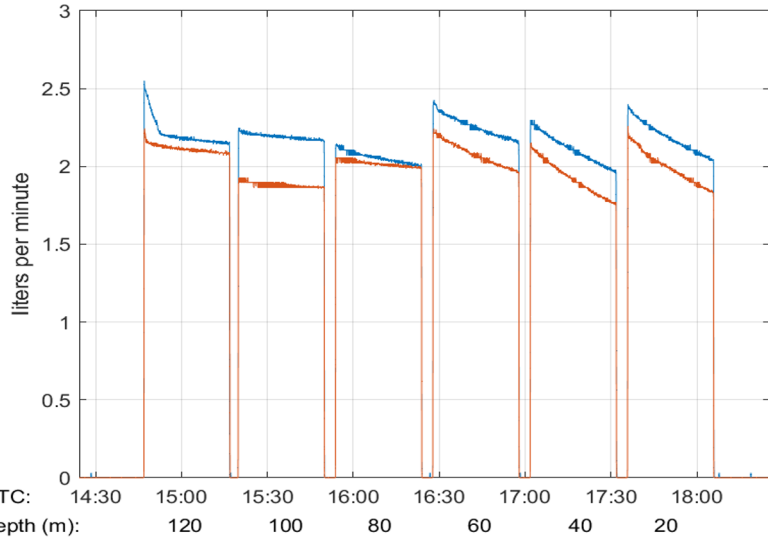**B.**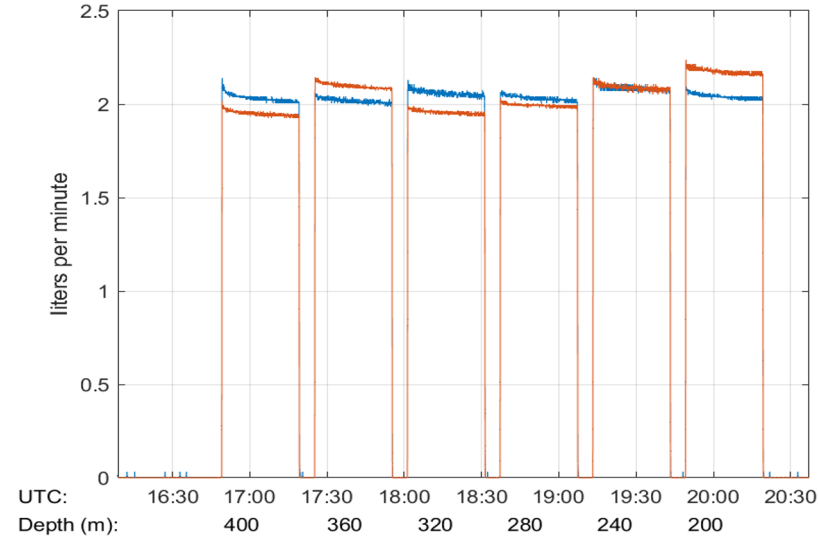**C.**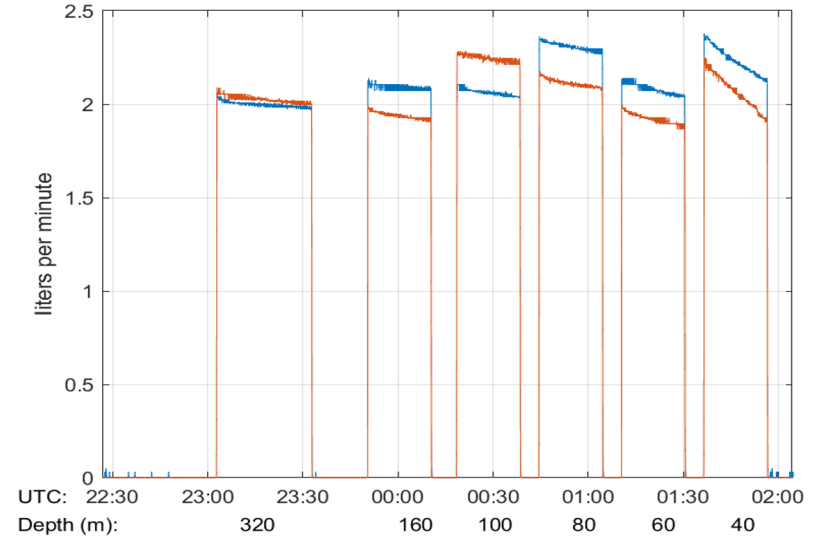

**Fig. 4.** *Mesobot* sampler flow rates over time. The red and blue lines represent the flow rate from duplicate pumps. A) MB009 (Bright Bank site); B) MB011 (Slope site); C) MB012 (Slope site).

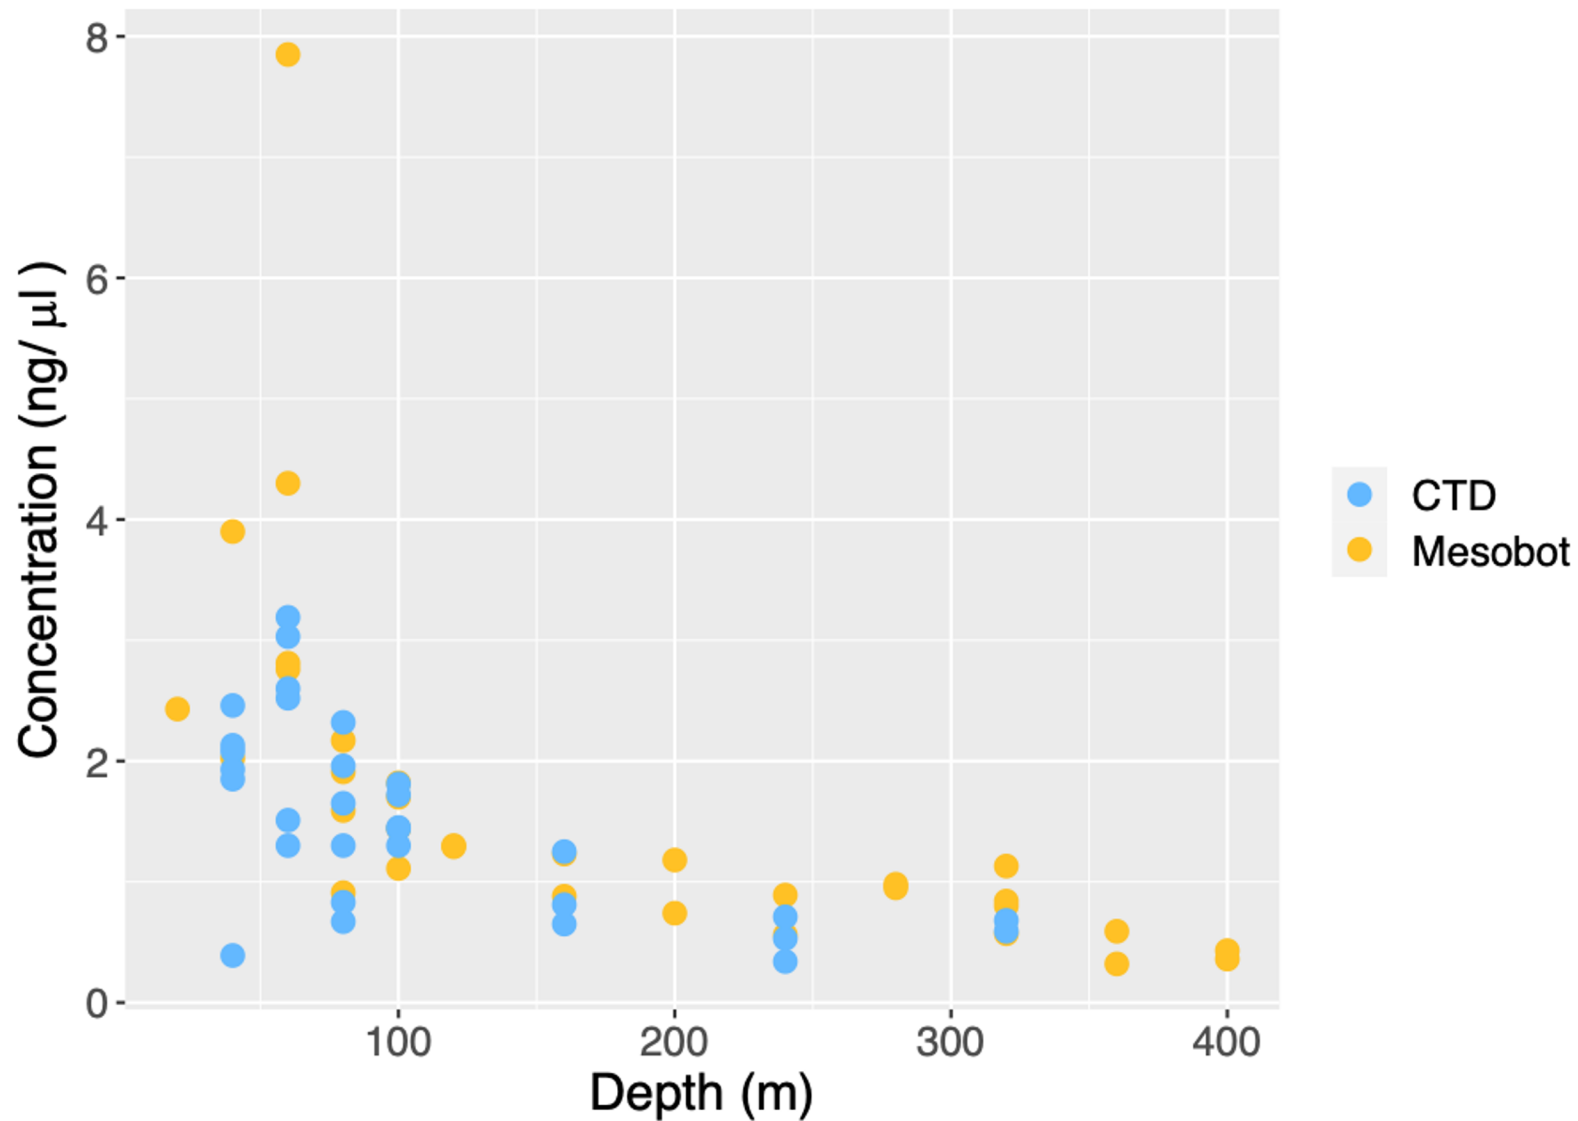

**Fig. 5.** DNA yield (total ng of DNA recovered per liter of water sampled) versus depth for the *Mesobot* and CTD samples. *Mesobot* sample yields are the sum of individually-extracted filter pieces divided by the sample volume. Concentrations from individual inner and outer filter pieces are shown in Fig. 6.

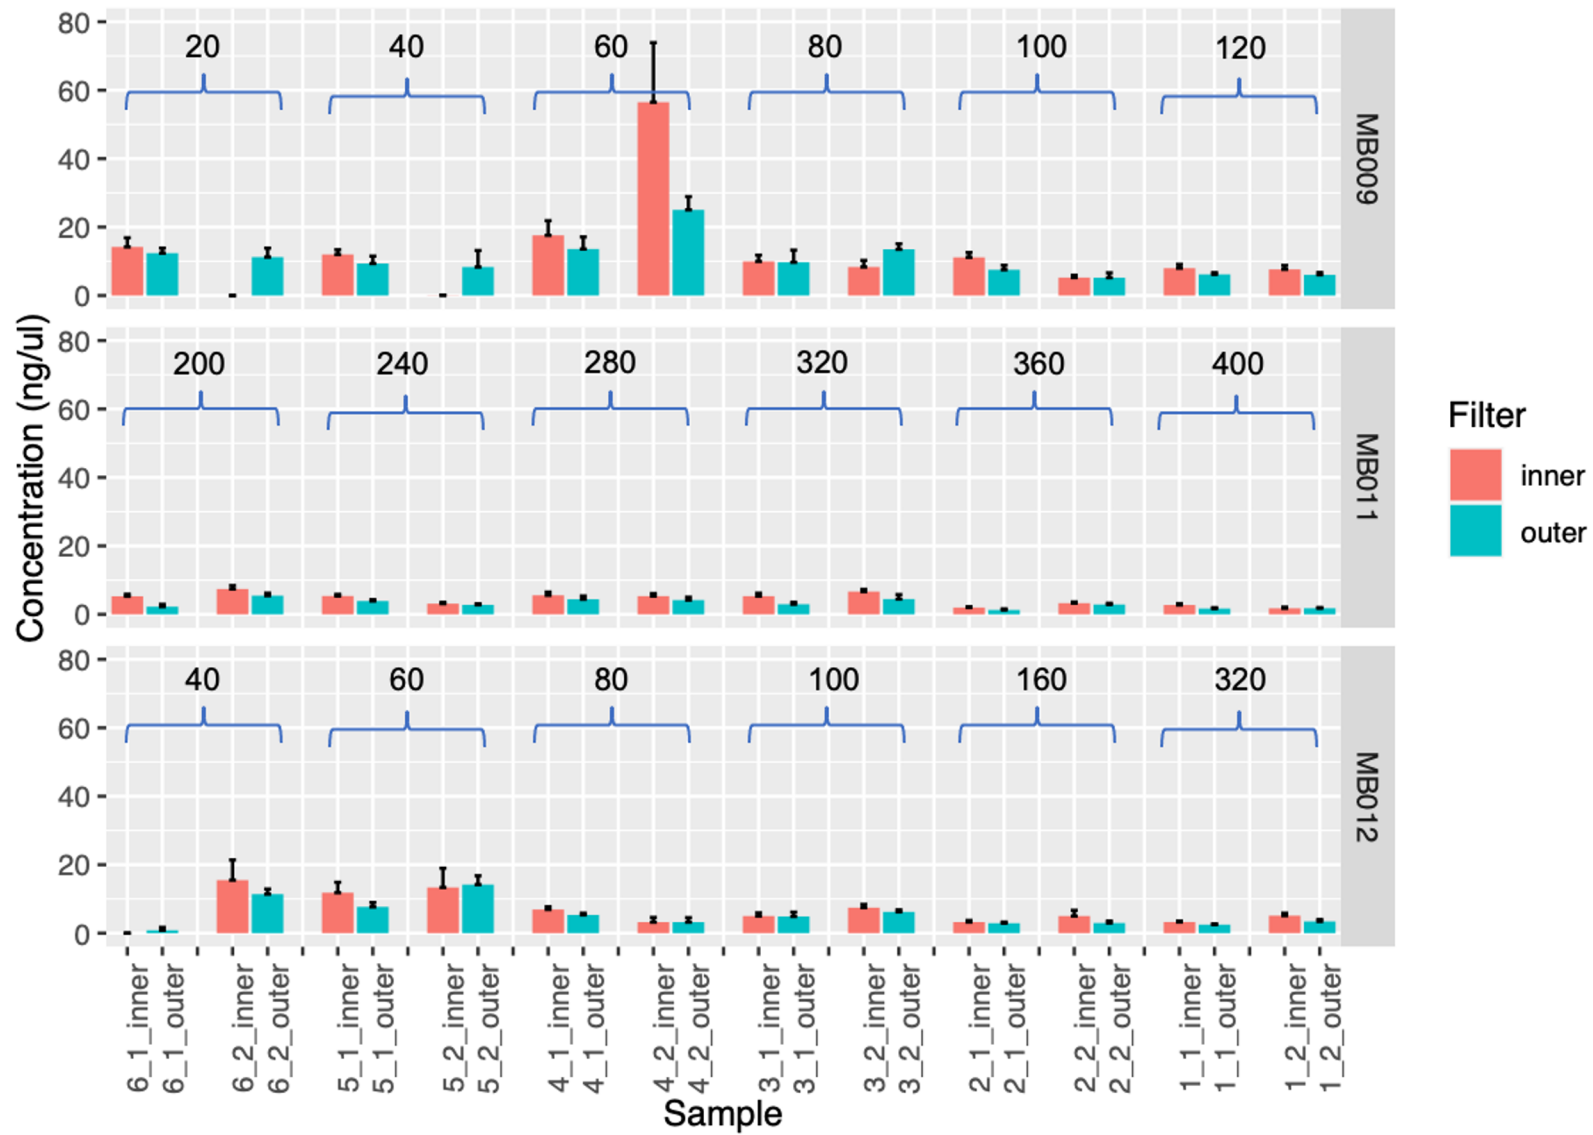

**Fig. 6.** DNA concentrations (mean +/- standard deviation) of inner and outer filter pieces from each *Mesobot* sample. Sampling depth (m) is indicated above bars. MB009 originates from the Bright Bank site and MB011 and MB012 originate from the Slope site.

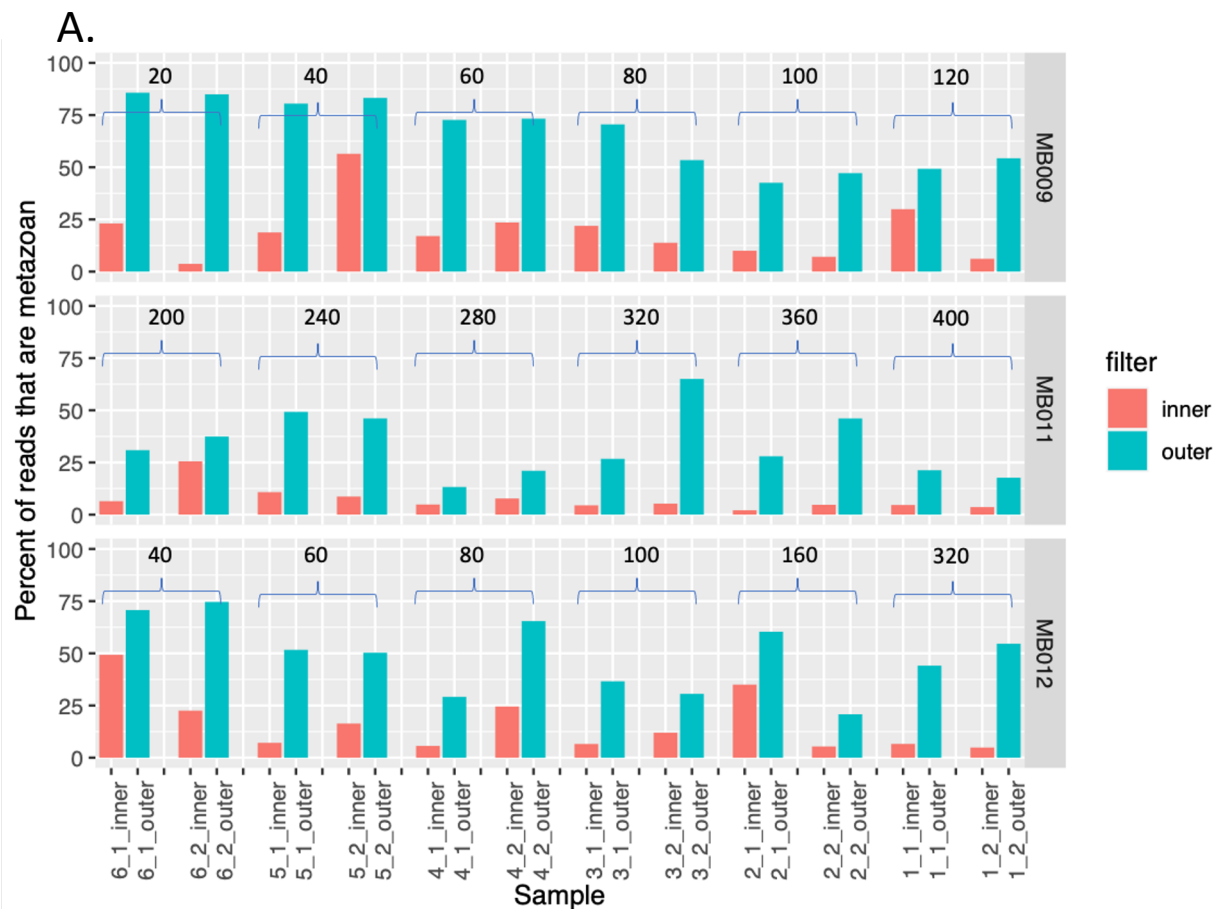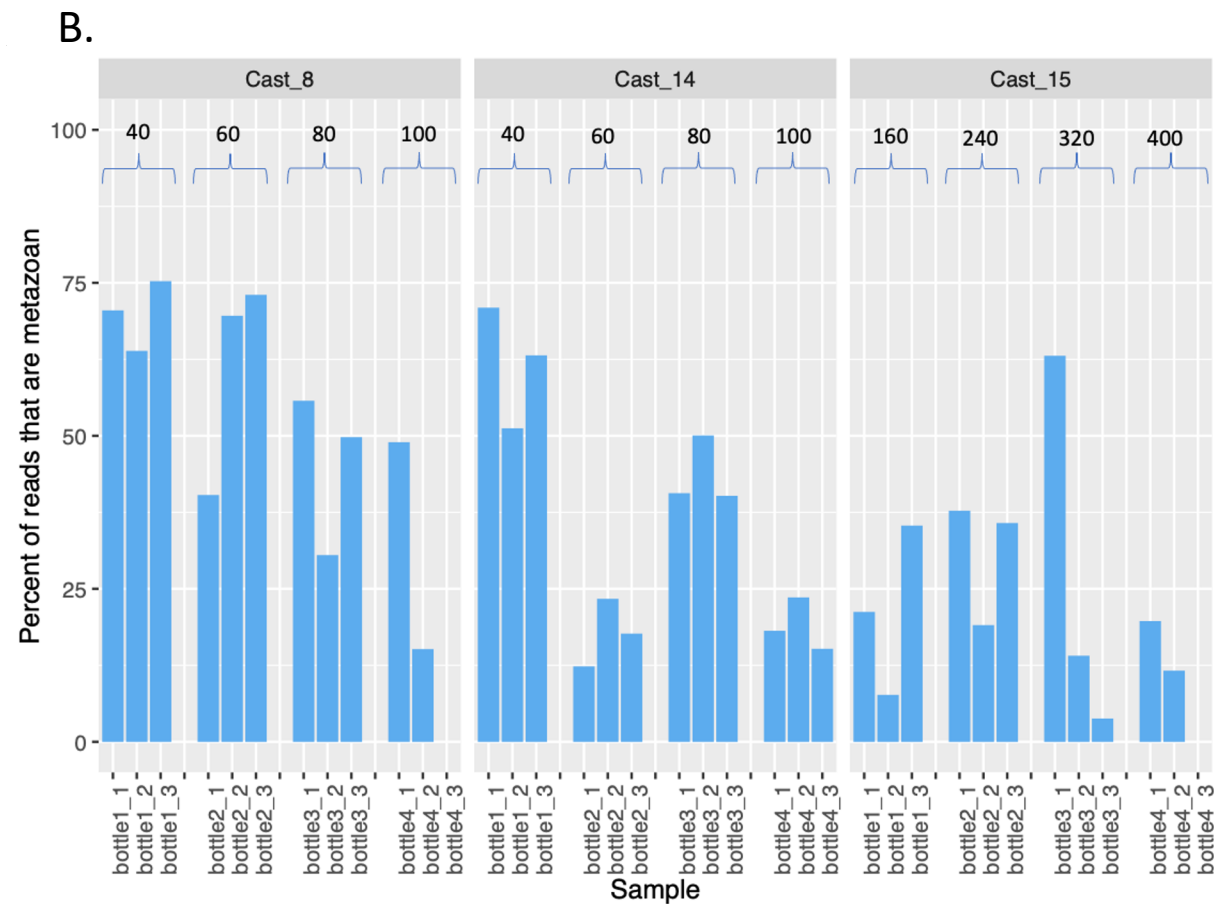

**Fig. 7.** Percent metazoan and non-metazoan reads from the A) inner and outer *Mesobot* sample filters; and B) CTD samples. Sampling depth (m) is indicated above the bars. Note we do not have samples for one of the replicates of Cast 8 - 100 m and for Cast 15 - 400 m, due to bottle mishaps. MB009 and Cast 8 originate from the Bright Bank site and MB011, MB012, Cast 14, and Cast 15 originate from the Slope site.

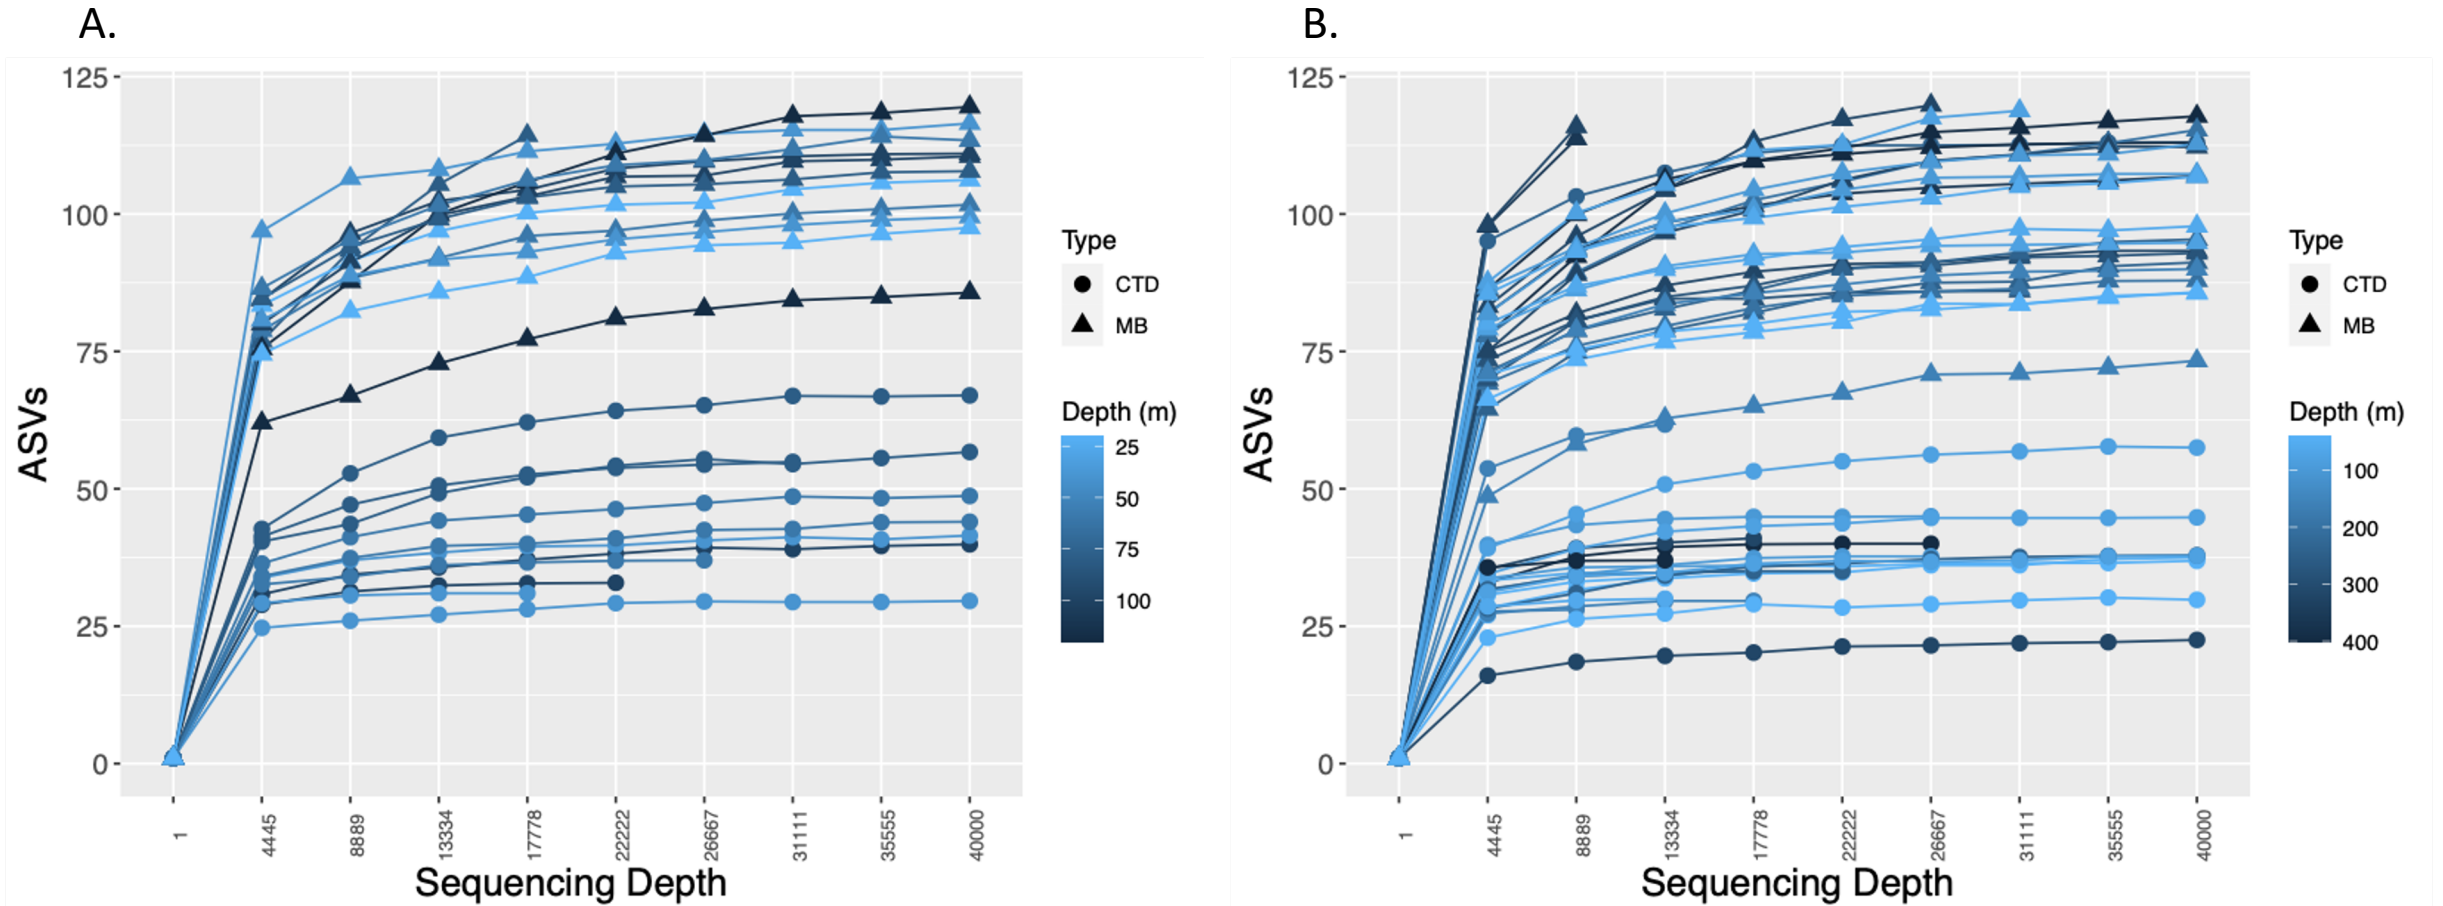

**Fig. 8.** Number of metazoan ASVs in the A) Bright Bank site (MB009 and Cast 8); and B) Slope site (MB011, MB012, Cast 14, and Cast 15). *Mesobot* sampler (MB) samples represent the merged inner and outer filter datasets. Sampling depth is indicated by shade. As some samples had extremely high read counts (>100,000), curves are truncated at 40,000 in order to visualize all samples, including those with much lower read counts. Total read counts for all samples are in Supplementary Table 3.

### A. Cast 8

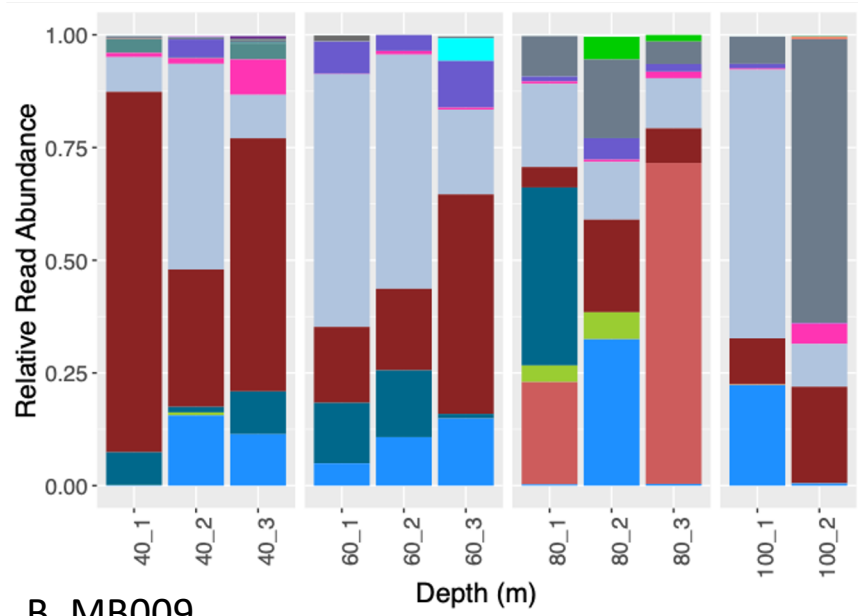

### B. MB009

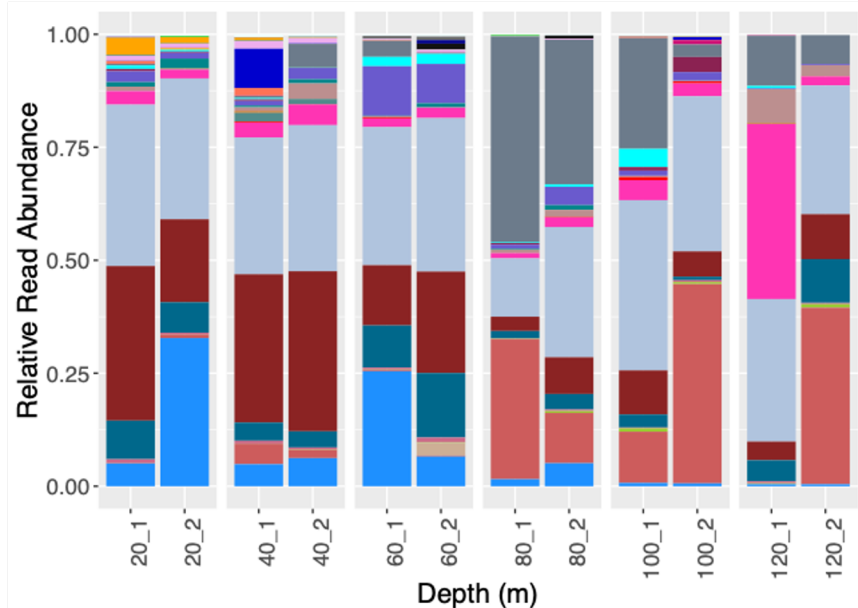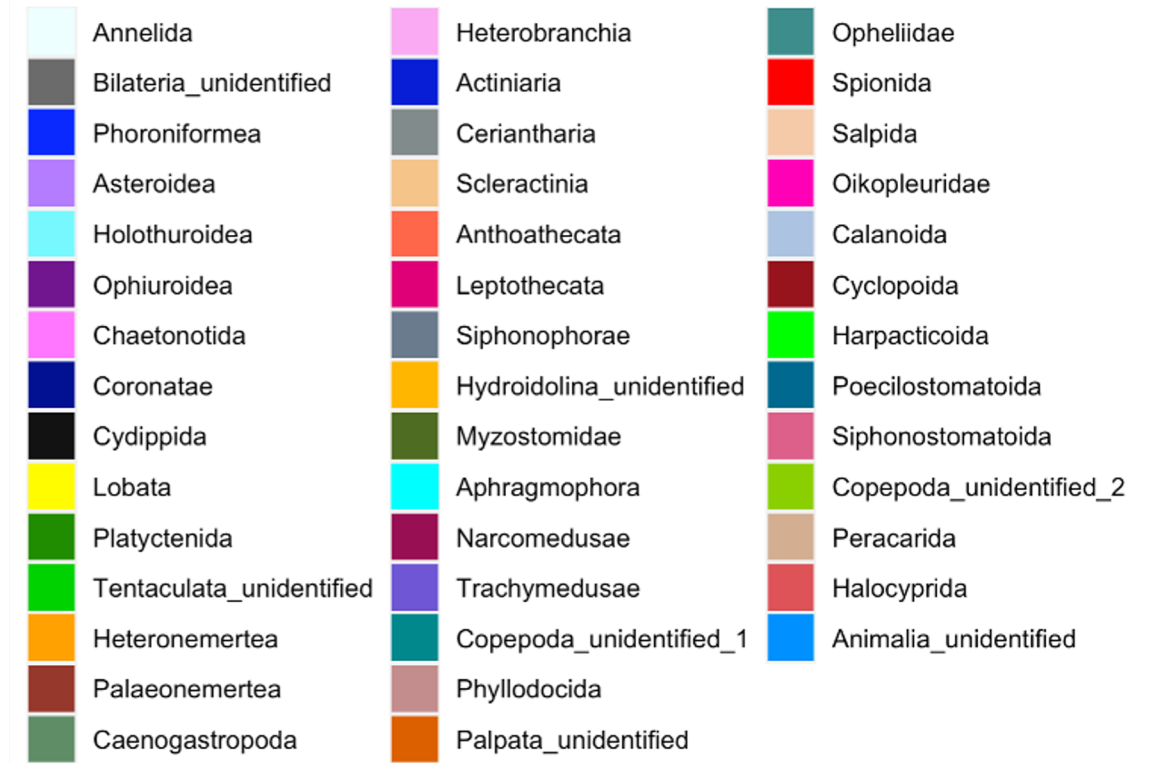

**Fig. 9.** Relative read abundances of Silva level-6 metazoan taxa from the Bright Bank site. A) Cast 8; B) MB009. Only taxa with a summed read frequency across all samples of >500 are shown.



A. Cast 14

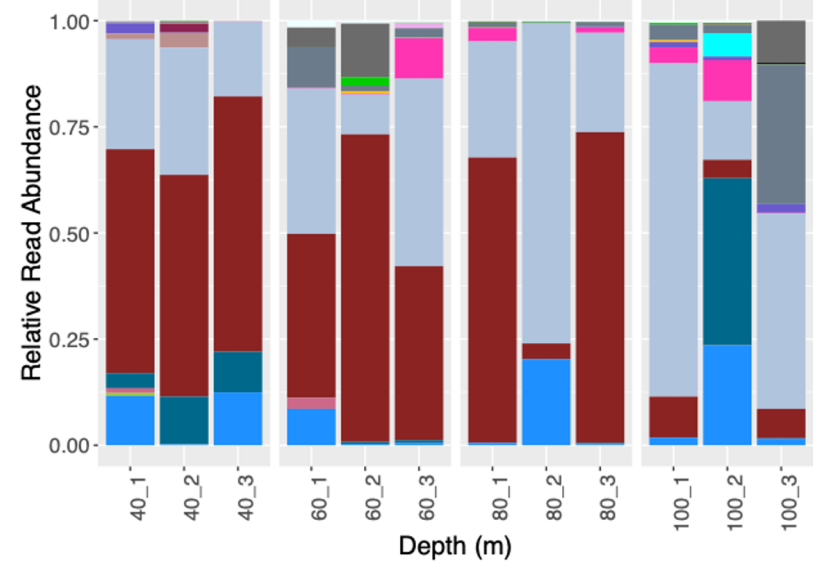

B. Cast 15

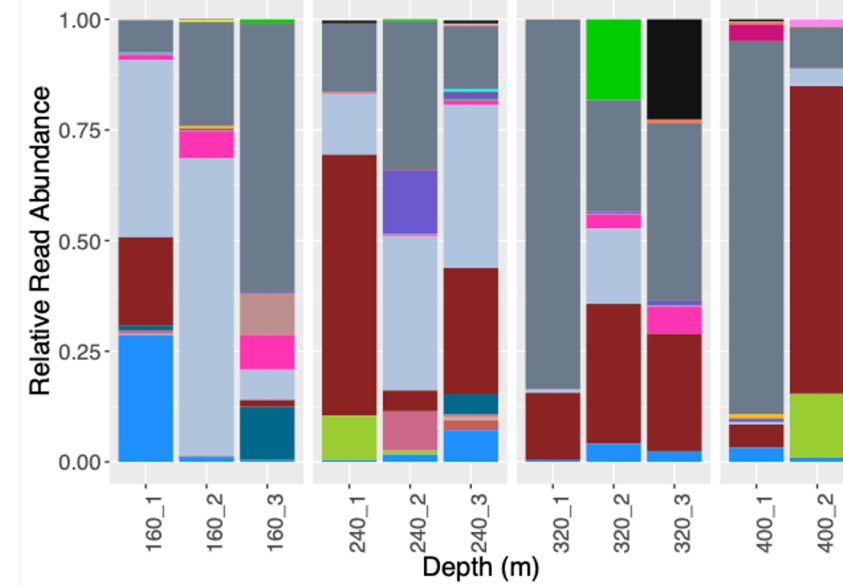

C. MB011

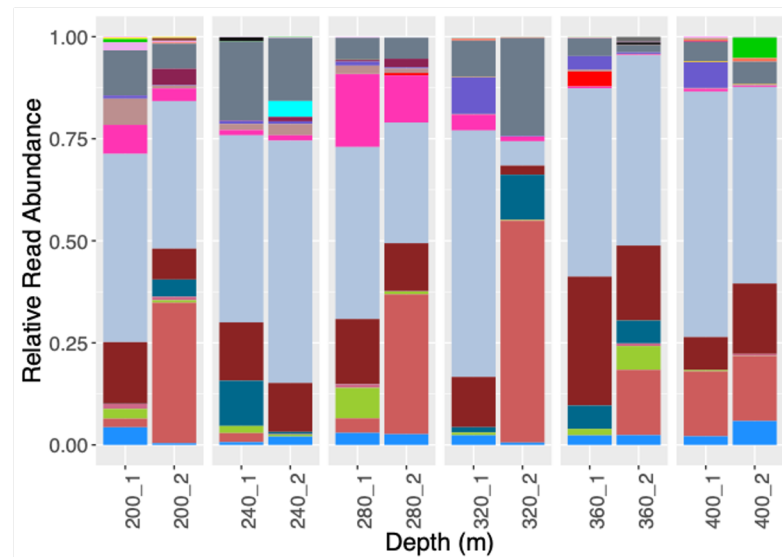

D. MB012

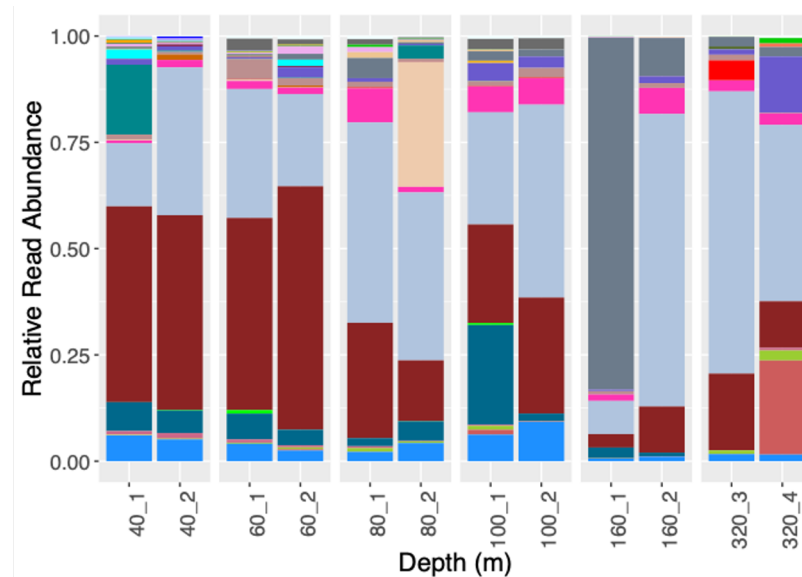

**Fig. 10.** Relative abundances of Silva level-6 taxa from the Slope site. A) Cast 14; B) Cast 15; C) MB011; D) MB012. Only taxa with a summed read frequency of >500 across all samples are shown. Legend is shown in Figure 9.



A. MB009 (Bright Bank)

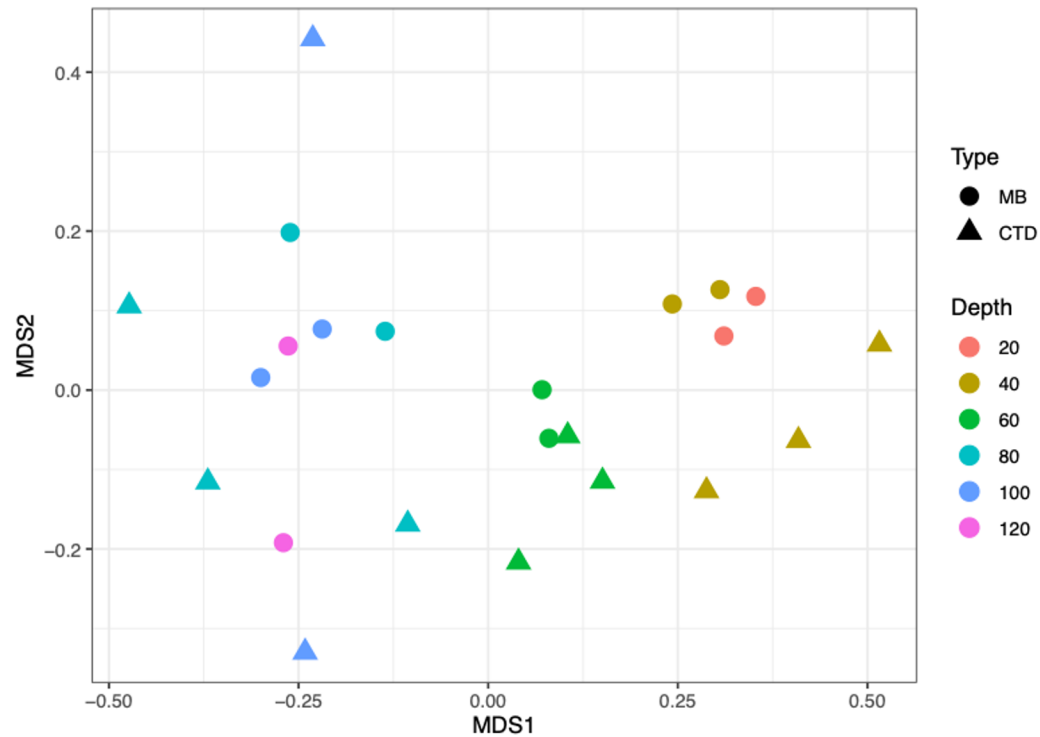

B. MB011 and MB012 (Slope)

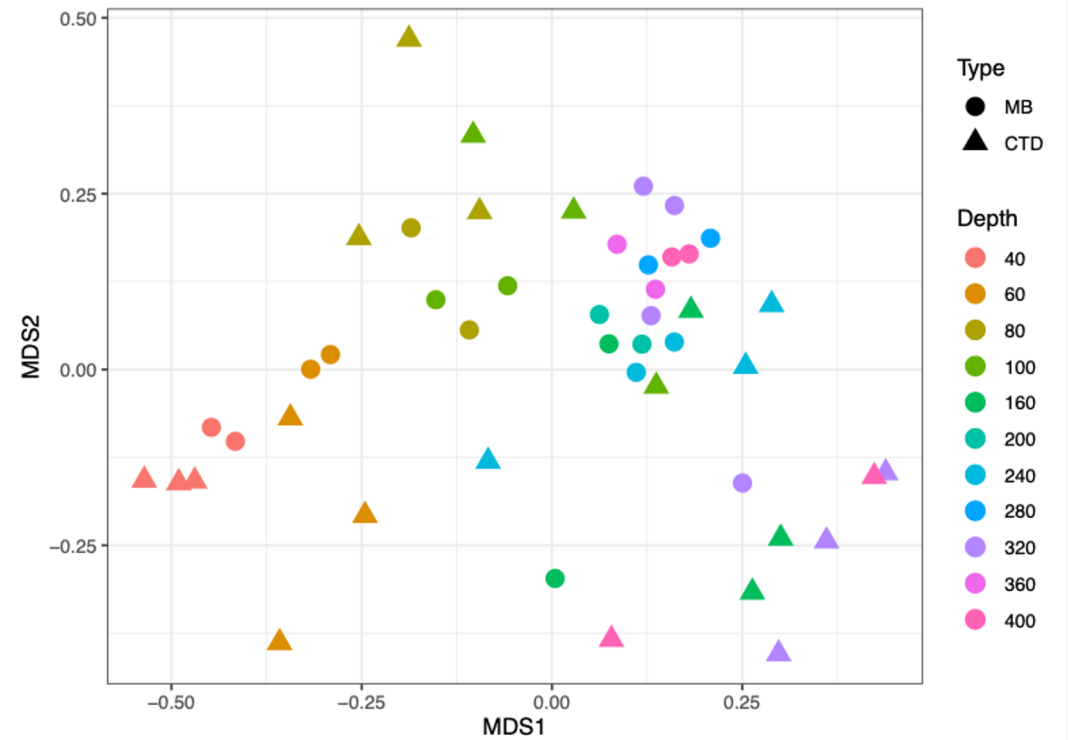

**Fig. 11.** nMDS plots based on Bray-Curtis dissimilarities from the A) MB009 deployment (Bright Bank site), stress = 0.1511615; and B) MB011 and MB012 deployments (Slope site), stress = 0.1815937.

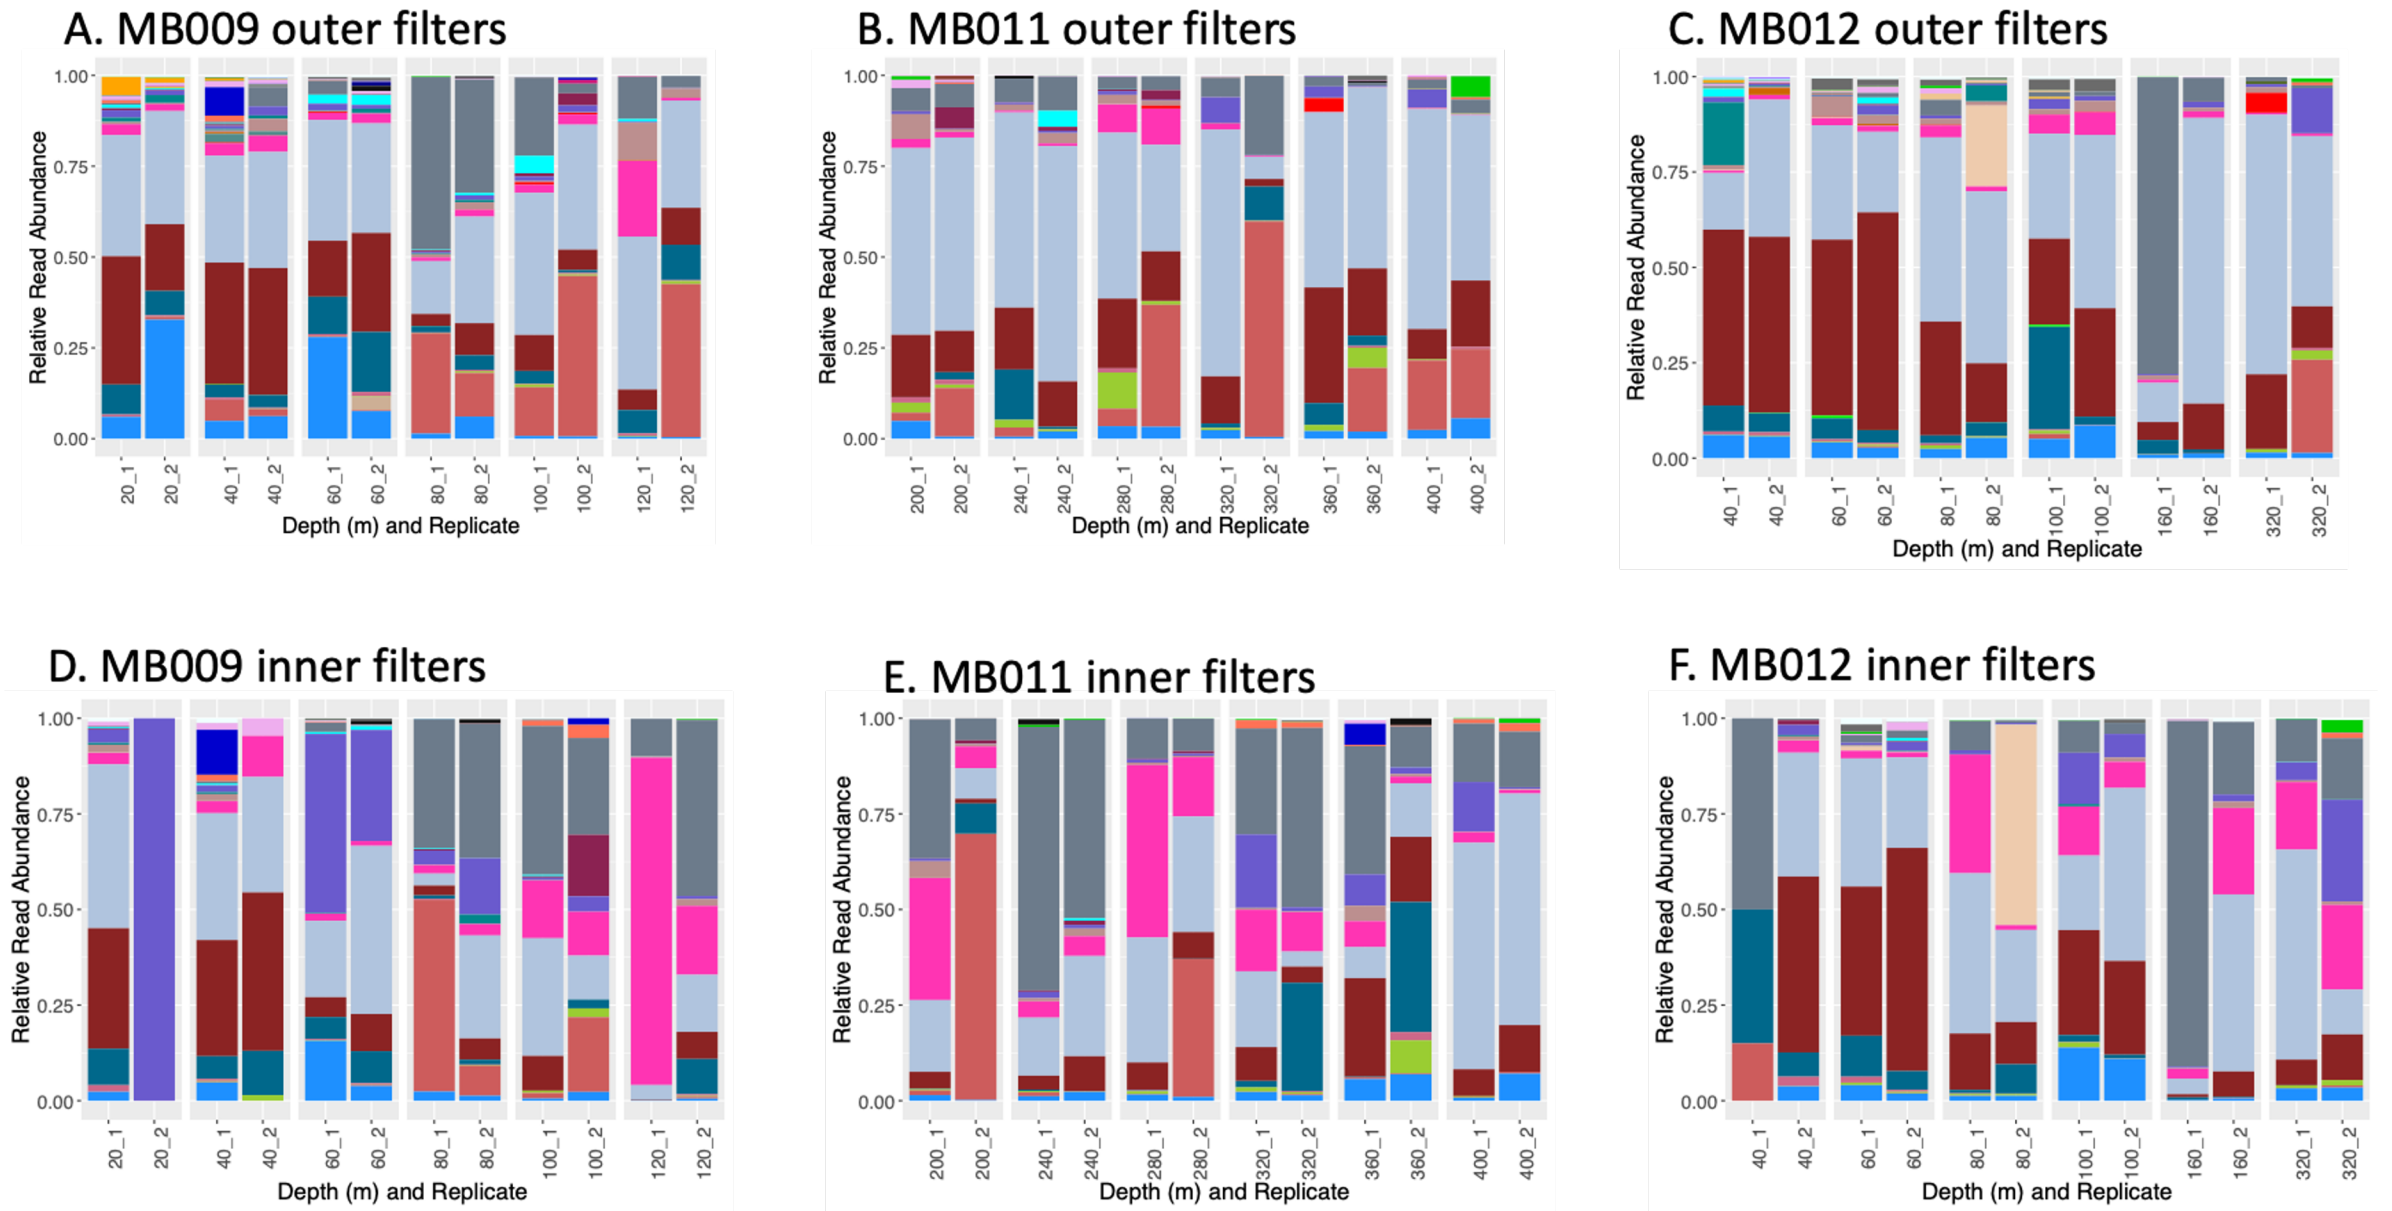

**Fig. 12.** Relative read abundance of level-6 taxa from the outer and inner *Mesobot* filters. A) MB009 (Bright Bank), outer filter; B) MB011 (Slope), outer filter; C) MB012 (Slope), outer filter; D) MB009 (Bright Bank), inner filter; E) MB011 (Slope), inner filter; F) MB012 (Slope), inner filter. Only taxa with a summed read frequency of >500 across all samples are shown. Legend is shown in Figure 9.

A. MB009 (Bright Bank)

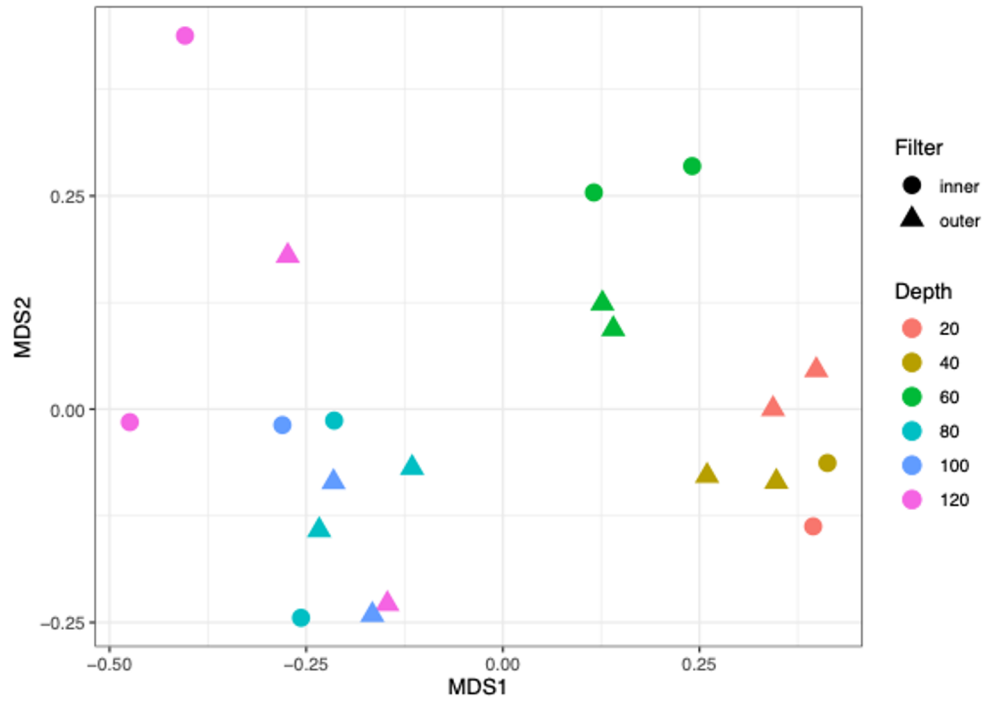

B. MB011 and MB012 (Slope)

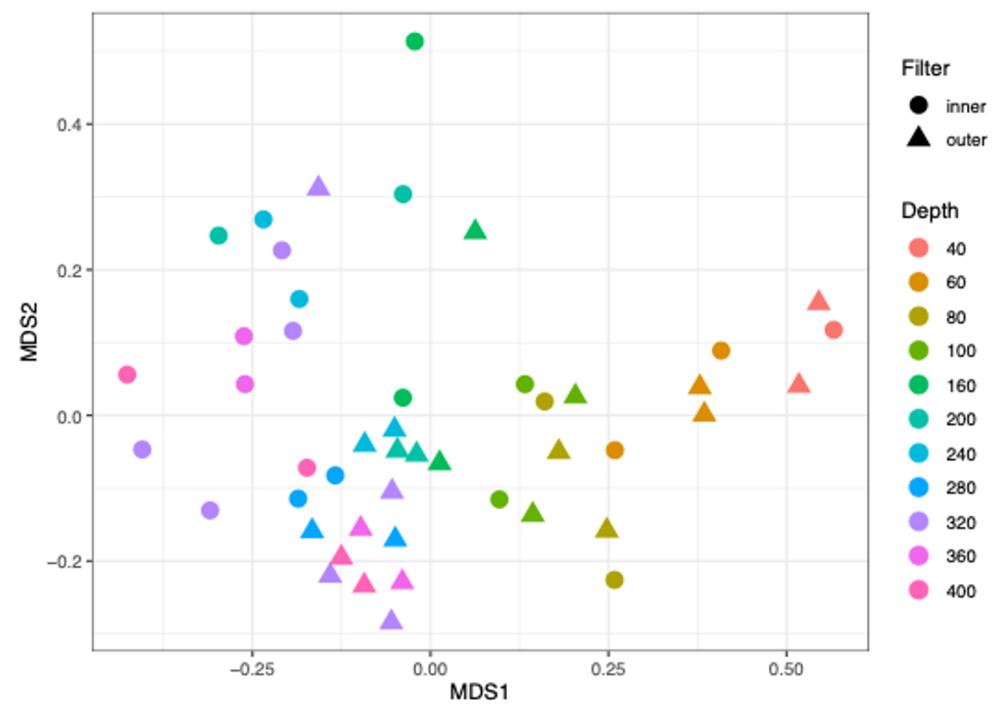

**Fig. 13.** nMDS plots based on Bray-Curtis dissimilarities comparing inner and outer filters and depth from the A) MB009 deployment (Bright Bank site), stress = 0.1436734; and B) the MB011 and MB012 deployments (Slope site), stress = 0.1856701.
